# Supplementary material for: The synthesis of carbonyl 2-amino-pyrimidines via tandem regioselective heterocyclization of 1,3-diynes with guanidine and selective oxidation
Source: Royal Society of Chemistry journal article supplement (doi:10.1039/c5cc02238j), 2015-01-01

# Synthesis of carbonyl 2-amino-pyrimidines via tandem regioselective heterocyclization of 1,3-diynes with guanidine and selective oxidation

Liang Zhang, Mingzhu Zhao, and Xiaoming Zhao\*

*Shanghai Key Lab of Chemical Assessment and Sustainability, Department of Chemistry,  
Tongji University, 1239 Siping Road, 200092 Shanghai, P.R. China  
E-mail: xmzhao08@mail.tongji.edu.cn*

## Table of Contents

|                                                         |    |
|---------------------------------------------------------|----|
| 1. General Experimental Conditions .....                | 01 |
| 2. Experimental procedures .....                        | 01 |
| 3. Compound characterization .....                      | 02 |
| 4. Reference .....                                      | 05 |
| 5. <sup>1</sup> H and <sup>13</sup> C NMR spectra ..... | 06 |

**General:** All manipulations were carried out under the air atmosphere using standard Schlenk techniques. All glassware was oven or flame dried immediately prior to use. All solvents were purified and dried according to standard methods prior to use, unless stated otherwise.

All reagents were obtained from commercial sources, most of them buy from Adamas-beta and used without further purification. <sup>1</sup>H NMR spectra were obtained at 400 MHz and recorded relative to tetramethylsilane signal (0 ppm) or residual protio-solvent. <sup>13</sup>C NMR spectra were obtained at 100 MHz and chemical shifts were recorded relative to the solvent resonance (CDCl<sub>3</sub>, 77.0 ppm). <sup>19</sup>F NMR spectra were obtained at 376 MHz. Data for <sup>1</sup>H NMR are recorded as follows: chemical shift (δ, ppm), multiplicity (s = singlet, d = doublet, t = triplet, m = multiplet or unresolved, br = broad singlet, coupling constant(s) in Hz, integration). Data for <sup>13</sup>C NMR are reported in terms of chemical shift (δ, ppm).

### General procedure for the synthesis of 4a–l

1,3-Diynes **1** (0.2 mmol), guanidine hydrochloride **2** (22.9 mg, 0.24 mmol), Cs<sub>2</sub>CO<sub>3</sub> (130.2 mg, 0.4 mmol), were dissolved in DMSO (2 mL) in a sealed tube, then the reaction mixture was stirred at 120 °C for 12 h. The mixture was diluted with NaCl solution and AcOEt (3 × 20 mL), dried with Na<sub>2</sub>SO<sub>4</sub>. After concentration of the filtrate to dryness, purification of the residue by silica gel column chromatography (Petroleum ether/AcOEt = 90/10), the desired product **4a–l** was obtained. The 1,3-diynes was prepared according to known procedures.<sup>1</sup>

## Compound characterization

### 4-Benzyl-6-phenylpyrimidin-2-amine (3a)

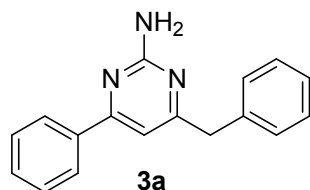

White solid, mp 140–141 °C.

$^1\text{H NMR}$  (400 MHz,  $\text{CDCl}_3$ )  $\delta$  = 7.87 (dd,  $J$  = 6.6, 3.0 Hz, 2H), 7.41 – 7.33 (m, 3H), 7.31 – 7.17 (m, 5H), 6.77 (s, 1H), 5.89 (s, 2H), 3.92 (s, 2H).  $^{13}\text{C NMR}$  (101 MHz,  $\text{CDCl}_3$ )  $\delta$  = 170.9, 165.9, 163.7, 138.1, 137.6, 130.4, 129.3, 128.8, 128.7, 127.2, 126.8, 106.9, 44.2. IR (KBr):  $\nu_{\text{max}}$  ( $\text{cm}^{-1}$ ) = 3479, 3319, 3173, 2360, 1572, 1361. HRMS (ESI):  $m/z$  [ $\text{M} + \text{Na}$ ] $^+$  calcd for  $\text{C}_{17}\text{H}_{15}\text{N}_3\text{Na}$ : 284.1158; Found: 284.1155.

### (2-Amino-6-phenylpyrimidin-4-yl)(phenyl)methanone (4a)

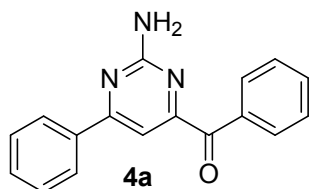

White solid, mp 122–124 °C, 99% yield (53.9 mg).

$^1\text{H NMR}$  (400 MHz,  $\text{CDCl}_3$ )  $\delta$  = 8.09 – 7.95 (m, 4H), 7.58 (t,  $J$  = 7.4 Hz, 1H), 7.45 (t,  $J$  = 6.1 Hz, 6H), 5.82 (s, 2H).  $^{13}\text{C NMR}$  (101 MHz,  $\text{CDCl}_3$ )  $\delta$  = 193.5, 167.3, 163.6, 163.0, 136.8, 135.3, 133.7, 131.1, 130.8, 128.9, 128.5, 127.3, 106.5. IR (KBr):  $\nu_{\text{max}}$  ( $\text{cm}^{-1}$ ) = 3482, 3319, 3197, 1673, 1566, 1364, 1218. HRMS (ESI):  $m/z$  [ $\text{M} + \text{Na}$ ] $^+$  calcd for  $\text{C}_{17}\text{H}_{13}\text{N}_3\text{NaO}$ : 298.0951; Found: 298.0945.

### (2-Amino-6-(p-tolyl)pyrimidin-4-yl)(p-tolyl)methanone (4b)

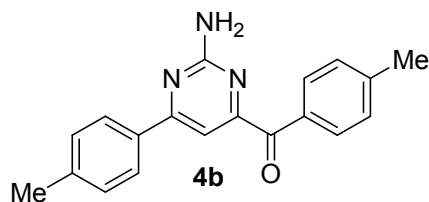

White solid, mp 162–164 °C, 99% yield (60.1 mg).

$^1\text{H NMR}$  (400 MHz,  $\text{CDCl}_3$ )  $\delta$  = 7.94 (dd,  $J$  = 9.8, 8.3 Hz, 4H), 7.42 (s, 1H), 7.29 – 7.22 (m, 4H), 5.65 (s, 2H), 2.40 (d,  $J$  = 7.3 Hz, 6H).  $^{13}\text{C NMR}$  (101 MHz,  $\text{CDCl}_3$ )  $\delta$  = 193.2, 167.1, 163.9, 162.9, 144.7, 141.5, 134.1, 132.7, 130.9, 129.6, 129.2, 127.2, 106.2, 21.8, 21.5. IR (KBr):  $\nu_{\text{max}}$  ( $\text{cm}^{-1}$ ) = 3491, 3319, 3194, 1667, 1566, 1363. HRMS (ESI):  $m/z$  [ $\text{M} + \text{H}$ ] $^+$  calcd for  $\text{C}_{19}\text{H}_{18}\text{N}_3\text{O}$ : 304.1444; Found: 304.1437.

### (2-Amino-6-(4-methoxyphenyl)pyrimidin-4-yl)(4-methoxyphenyl)methanone (4c)

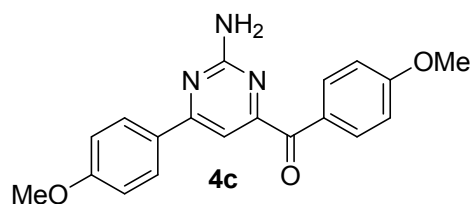

White solid, mp 173–174 °C, 90% yield (60.3 mg).

<sup>1</sup>H NMR (400 MHz, CDCl<sub>3</sub>) δ = 8.08 (t, *J* = 8.1 Hz, 4H), 7.40 (s, 1H), 6.99 (dd, *J* = 12.7, 8.4 Hz, 4H), 5.86 (s, 2H), 3.88 (d, *J* = 4.8 Hz, 6H). <sup>13</sup>C NMR (101 MHz, CDCl<sub>3</sub>) δ = 191.5, 165.6, 164.5, 164.3, 162.5, 161.8, 133.4, 129.1, 128.1, 127.8, 114.4, 113.8, 105.8, 55.6, 55.5. IR (KBr):  $\nu_{\max}$  (cm<sup>-1</sup>) = 3378, 3304, 3199, 1659, 1593, 1361, 1254. HRMS (ESI): *m/z* [M + Na]<sup>+</sup> calcd for C<sub>19</sub>H<sub>17</sub>N<sub>3</sub>NaO<sub>3</sub>: 358.1162; Found: 358.1163.

**(2-Amino-6-(4-pentylphenyl)pyrimidin-4-yl)(4-pentylphenyl)methanone (4d)**

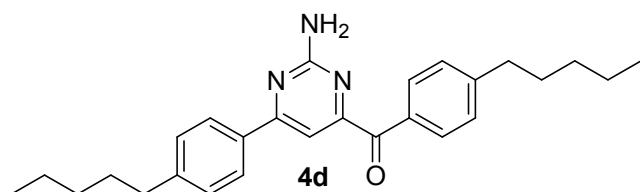

White solid, mp 128–129 °C, 98% yield (81.1 mg).

<sup>1</sup>H NMR (400 MHz, CDCl<sub>3</sub>) δ = 7.96 (dd, *J* = 11.6, 8.2 Hz, 4H), 7.42 (s, 1H), 7.27 (d, *J* = 7.2 Hz, 4H), 5.72 (d, *J* = 5.7 Hz, 2H), 2.65 (dd, *J* = 13.5, 7.1 Hz, 4H), 1.69 – 1.57 (m, 4H), 1.36 – 1.28 (m, 8H), 0.88 (td, *J* = 6.8, 2.6 Hz, 6H). <sup>13</sup>C NMR (101 MHz, CDCl<sub>3</sub>) δ = 193.2, 167.2, 163.9, 162.9, 149.6, 146.4, 134.3, 132.9, 131.0, 128.9, 128.5, 127.2, 106.2, 36.1, 35.8, 31.5, 30.9, 30.8, 22.6, 22.5, 14.1, 14.0. IR (KBr):  $\nu_{\max}$  (cm<sup>-1</sup>) = 3491, 3315, 3194, 2926, 1679, 1541, 1364, 1230. HRMS (ESI): *m/z* [M + Na]<sup>+</sup> calcd for C<sub>27</sub>H<sub>33</sub>N<sub>3</sub>NaO: 438.2516; Found: 438.2515.

**(2-Amino-6-(4-fluorophenyl)pyrimidin-4-yl)(4-fluorophenyl)methanone (4e)**

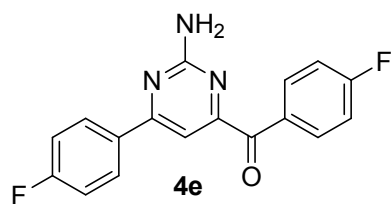

White solid, mp 141–142 °C, 90% yield (55.9 mg).

<sup>1</sup>H NMR (400 MHz, DMSO) δ = 7.92 – 7.87 (m, 4H), 7.33 (t, *J* = 8.9 Hz, 5H), 7.09 (s, 2H). <sup>13</sup>C NMR (101 MHz, DMSO) δ = 163.2, 160.8, 152.2, 127.2(d, *J* = 3.0 Hz), 126.0(d, *J* = 8.2 Hz), 116.3(d, *J* = 21.3 Hz), 108.5. <sup>19</sup>F NMR (377 MHz, DMSO) δ = -114.00. IR (KBr):  $\nu_{\max}$  (cm<sup>-1</sup>) = 3535, 3343, 3171, 1650, 1557, 1233, 768. HRMS (ESI): *m/z* [M + Na]<sup>+</sup> calcd for C<sub>17</sub>H<sub>11</sub>F<sub>2</sub>N<sub>3</sub>NaO: 334.0762; Found: 334.0762.

**(2-Amino-6-(4-bromophenyl)pyrimidin-4-yl)(4-bromophenyl)methanone (4f)**

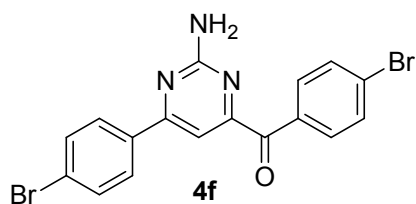

White solid, mp 210–211 °C, 91% yield (78.2 mg).

$^1\text{H}$  NMR (400 MHz, DMSO)  $\delta$  = 8.11 (d,  $J$  = 8.6 Hz, 2H), 7.93 (d,  $J$  = 8.5 Hz, 2H), 7.76 (dd,  $J$  = 19.8, 8.5 Hz, 4H), 7.51 (s, 1H), 7.16 (s, 2H).  $^{13}\text{C}$  NMR (101 MHz, DMSO)  $\delta$  = 192.9, 165.1, 164.1, 163.7, 136.1, 134.5, 132.8, 132.3, 132.1, 129.5, 129.5, 128.5, 125.2, 104.1. IR (KBr):  $\nu_{\text{max}}$  ( $\text{cm}^{-1}$ ) = 3476, 3313, 3185, 1670, 1619, 1360, 1247, 756. HRMS (ESI):  $m/z$   $[\text{M} + \text{Na}]^+$  calcd for  $\text{C}_{17}\text{H}_{11}\text{Br}_2\text{N}_3\text{NaO}$ : 453.9161; Found: 453.9154.

**(2-Amino-6-(3-chlorophenyl)pyrimidin-4-yl)(3-chlorophenyl)methanone (4g)**

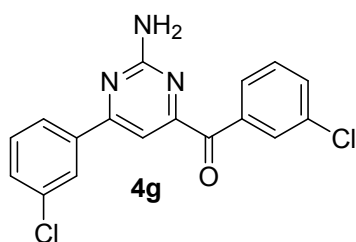

White solid, mp 157–158 °C, 97% yield (67.0 mg).

$^1\text{H}$  NMR (400 MHz, DMSO)  $\delta$  = 8.25 (s, 1H), 8.14 (d,  $J$  = 7.6 Hz, 1H), 8.02 – 7.91 (m, 2H), 7.83 – 7.76 (m, 1H), 7.59 (dt,  $J$  = 13.3, 7.9 Hz, 4H), 7.24 (s, 2H).  $^{13}\text{C}$  NMR (101 MHz, DMSO)  $\delta$  = 192.5, 164.7, 163.9, 163.6, 139.1, 137.4, 134.3, 133.9, 133.8, 131.2, 131.1, 130.2, 129.6, 127.1, 126.1, 104.5. IR (KBr):  $\nu_{\text{max}}$  ( $\text{cm}^{-1}$ ) = 3459, 3313, 3181, 1640, 1536, 1352, 1212. HRMS (ESI):  $m/z$   $[\text{M} + \text{Na}]^+$  calcd for  $\text{C}_{17}\text{H}_{11}\text{Cl}_2\text{N}_3\text{NaO}$ : 366.0171; Found: 366.0171.

**(2-Amino-6-(m-tolyl)pyrimidin-4-yl)(m-tolyl)methanone (4h)**

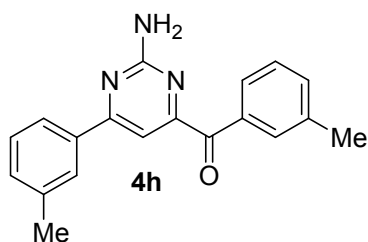

White solid, mp 139–140 °C, 99% yield (60.1 mg).

$^1\text{H}$  NMR (400 MHz,  $\text{CDCl}_3$ )  $\delta$  = 7.85 (ddd,  $J$  = 17.8, 7.5, 3.9 Hz, 4H), 7.44 (d,  $J$  = 7.1 Hz, 2H), 7.41 – 7.34 (m, 2H), 7.31 (d,  $J$  = 7.5 Hz, 1H), 5.70 (s, 2H), 2.42 (d,  $J$  = 6.1 Hz, 6H).  $^{13}\text{C}$  NMR (101 MHz,  $\text{CDCl}_3$ )  $\delta$  = 193.8, 167.5, 163.8, 163.0, 138.6, 138.3, 136.8, 135.3, 134.5, 131.8, 131.0, 128.8, 128.3, 128.2, 127.9, 124.4, 106.6, 21.5, 21.4. IR (KBr):  $\nu_{\text{max}}$  ( $\text{cm}^{-1}$ ) = 3488, 3316, 3196, 1670, 1569, 1358, 1271. HRMS (ESI):  $m/z$   $[\text{M} + \text{Na}]^+$  calcd for  $\text{C}_{19}\text{H}_{17}\text{N}_3\text{NaO}$ : 326.1264; Found: 326.1264.

**(2-Amino-6-(thiophen-2-yl)pyrimidin-4-yl)(thiophen-2-yl)methanone (4i)**

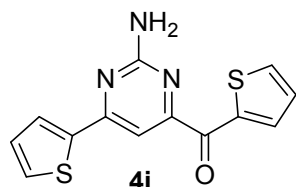

White solid, mp 134–135 °C, 91% yield (52.2 mg).

<sup>1</sup>H NMR (400 MHz, CDCl<sub>3</sub>) δ = 8.74 (dd, *J* = 2.9, 1.1 Hz, 1H), 8.11 (dd, *J* = 3.0, 1.2 Hz, 1H), 7.82 (dd, *J* = 5.1, 1.1 Hz, 1H), 7.68 (dd, *J* = 5.1, 1.2 Hz, 1H), 7.50 (s, 1H), 7.40 (dd, *J* = 5.1, 3.0 Hz, 1H), 7.34 (dd, *J* = 5.1, 2.9 Hz, 1H), 5.47 (s, 2H). <sup>13</sup>C NMR (101 MHz, CDCl<sub>3</sub>) δ = 185.7, 163.4, 162.9, 162.8, 140.1, 139.3, 137.4, 128.9, 127.2, 126.8, 126.2, 125.7, 106.4. IR (KBr):  $\nu_{\max}$  (cm<sup>-1</sup>) = 3488, 3351, 3197, 1656, 1572, 1423, 1230. HRMS (ESI): *m/z* [M + H]<sup>+</sup> calcd for C<sub>13</sub>H<sub>10</sub>N<sub>3</sub>OS<sub>2</sub>: 288.0260; Found: 288.0260.

### 1-(2-Amino-6-pentylpyrimidin-4-yl)hexan-1-one (4j)

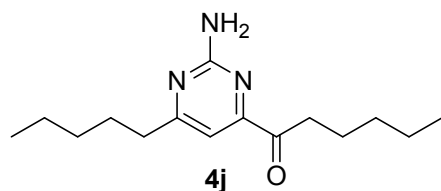

Colorless oil, 90% yield (47.3 mg).

<sup>1</sup>H NMR (400 MHz, CDCl<sub>3</sub>) δ = 6.36 (s, 1H), 5.10 (s, 2H), 2.60 – 2.43 (m, 4H), 1.76 – 1.56 (m, 4H), 1.31 (ddd, *J* = 9.5, 7.2, 3.6 Hz, 8H), 0.98 – 0.83 (m, 6H). <sup>13</sup>C NMR (101 MHz, CDCl<sub>3</sub>) δ = 171.9, 162.8, 109.4, 37.8, 37.8, 37.5, 31.7, 31.6, 31.6, 31.0, 29.4, 29.1, 28.9, 28.9, 28.6, 22.6, 22.5, 22.5, 22.5, 14.1, 14.1, 14.0, 13.9. IR (KBr):  $\nu_{\max}$  (cm<sup>-1</sup>) = 3500, 3310, 3169, 1629, 1578, 1453, 1381. HRMS (ESI): *m/z* [M + H]<sup>+</sup> calcd for C<sub>15</sub>H<sub>26</sub>N<sub>3</sub>O: 264.2070; Found: 264.2093.

### (2-Amino-6-(2-chlorophenyl)pyrimidin-4-yl)(2-chlorophenyl)methanone (4k)

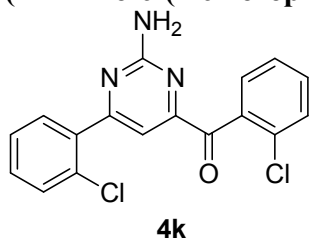

Yellow solid, mp 165–166 °C, 85% yield (58.3 mg).

<sup>1</sup>H NMR (400 MHz, DMSO) δ = 7.62 (ddd, *J* = 14.7, 6.0, 2.8 Hz, 5H), 7.51 (dt, *J* = 8.7, 2.4 Hz, 3H), 7.28 (s, 1H), 7.20 (s, 2H). <sup>13</sup>C NMR (101 MHz, DMSO) δ = 195.3, 167.2, 164.3, 161.4, 137.6, 137.4, 132.9, 131.6, 131.5, 131.4, 131.2, 130.9, 130.6, 130.5, 130.33, 127.9, 127.6, 108.0. IR (KBr):  $\nu_{\max}$  (cm<sup>-1</sup>) = 3319, 3203, 3062, 1694, 1539, 1358, 1215. HRMS (ESI): *m/z* [M + Na]<sup>+</sup> calcd for C<sub>17</sub>H<sub>11</sub>Cl<sub>2</sub>N<sub>3</sub>NaO: 366.0171; Found: 366.0156.

### (2-Amino-6-(4-methoxyphenyl)pyrimidin-4-yl)(4-pentylphenyl)methanone (4l)

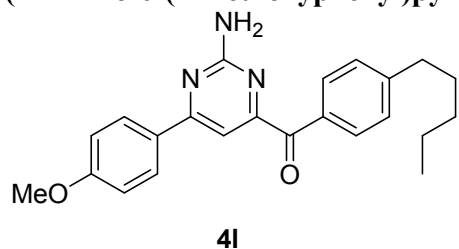

White solid, mp 162–163 °C, 43% yield (31.4 mg).

<sup>1</sup>H NMR (400 MHz, CDCl<sub>3</sub>) δ = 8.00 (dd, *J* = 16.1, 8.6 Hz, 4H), 7.41 (s, 1H), 7.29 (d, *J* = 8.2 Hz, 2H), 6.98 (d, *J* = 8.8 Hz, 2H), 5.51 (s, 2H), 3.86 (s, 3H), 2.74 – 2.60 (m, 2H), 1.71 – 1.58 (m, 2H), 1.39 – 1.27 (m, 4H), 0.89 (t, *J* = 6.8 Hz, 3H). <sup>13</sup>C NMR (101 MHz, CDCl<sub>3</sub>) δ = 193.3, 166.6, 163.8, 162.8, 162.1, 149.7, 132.9, 131.0, 129.3, 128.9, 128.5, 114.2, 105.8, 55.4, 36.2, 31.5, 30.8, 22.5, 14.0. IR (KBr):  $\nu_{\max}$  (cm<sup>-1</sup>) = 3485, 3316, 3197, 1664, 1608, 1361, 1254, 1171. HRMS (ESI): *m/z* [M + Na]<sup>+</sup> calcd for C<sub>23</sub>H<sub>25</sub>N<sub>3</sub>NaO<sub>2</sub>: 398.1839; Found: 398.1810.

**(2-Amino-6-(4-pentylphenyl)pyrimidin-4-yl)(4-methoxyphenyl)methanone (4I')**

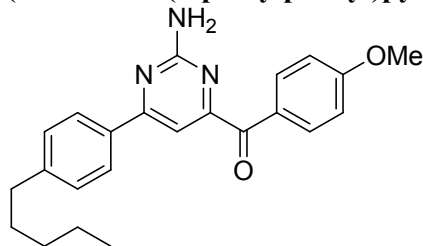

**4I'**

White solid, mp 118–120 °C, 51% yield (37.2 mg).

<sup>1</sup>H NMR (400 MHz, CDCl<sub>3</sub>) δ = 8.07 (dd, *J* = 50.4, 8.4 Hz, 4H), 7.47 (s, 1H), 7.33 (d, *J* = 8.1 Hz, 2H), 7.00 (d, *J* = 8.8 Hz, 2H), 5.60 (s, 2H), 3.91 (s, 3H), 2.70 (t, *J* = 7.7 Hz, 2H), 1.80 – 1.61 (m, 2H), 1.37 (d, *J* = 3.4 Hz, 4H), 0.94 (t, *J* = 6.7 Hz, 3H). <sup>13</sup>C NMR (101 MHz, CDCl<sub>3</sub>) δ = 192.0, 167.2, 164.3, 164.1, 162.8, 146.5, 134.3, 133.4, 129.0, 128.1, 127.2, 113.8, 106.3, 55.6, 35.8, 31.5, 31.0, 22.6, 14.1. IR (KBr):  $\nu_{\max}$  (cm<sup>-1</sup>) = 3491, 3310, 3194, 1653, 1596, 1536, 1254, 1158. HRMS (ESI): *m/z* [M + Na]<sup>+</sup> calcd for C<sub>23</sub>H<sub>25</sub>N<sub>3</sub>NaO<sub>2</sub>: 398.1839; Found: 398.1812.

**Controlled experiments for the synthesis of 3 ab**

1,3-Diynes **1** (0.2 mmol), guanidine hydrochloride **2** (191.1 mg, 2.0 mmol), Cs<sub>2</sub>CO<sub>3</sub> (130.2 mg, 0.4 mmol), were dissolved in DMSO-*d*<sub>6</sub> (2 mL) and H<sub>2</sub>O (50 μl) in a sealed tube, then the reaction was stirred at 120 °C for 12 h. The mixture was diluted with NaCl solution and AcOEt (3 × 20 mL), dried with Na<sub>2</sub>SO<sub>4</sub>. After concentration of the filtrate to dryness, purification of the residue by silica gel column chromatography (Petroleum ether/AcOEt = 90/10) gave **3 ab** (46.9 mg), 89% yield (53.9 mg).

<sup>1</sup>H NMR (400 MHz, CDCl<sub>3</sub>) δ = 7.88 (dd, *J* = 6.4, 2.7 Hz, 2H), 7.44–7.34 (m, 3H), 7.33–7.11 (m, 5H), 6.79 (s, 0.52H), 5.82 (s, 2H), 3.91 (s, 0.2H).

**References:**

- 1 For selective review, see: (a) P. Siemsen, R. C. Livingston and F. Diederich, *Angew. Chem., Int. Ed.* 2000, **39**, 2632; for selective methods for the synthesis of 1,3-diynes, see: (a) F. Sondheimer, Y. Amiel and R. Wolovsky, *J. Am. Chem. Soc.* 1957, **79**, 4247; (b) A. S. Hay, *J. Org. Chem.* 1960, **25**, 1275; (c) A. S. Hay, *J. Org. Chem.* 1962, **27**, 3320; (d) A. L. K. S. Shun and R. R. Tykwinski, *Angew. Chem., Int. Ed.* 2006, **45**, 1034; (e) G. Cahiez, A. Moyeux, J. Buendia and C. Duplais, *J. Am. Chem. Soc.* 2007, **129**, 13788; (f) K. Kamata, S. Yamaguchi, M. Kotani, K. Yamaguchi and N. Mizuno, *Angew. Chem., Int. Ed.* 2008, **47**, 2407; (g) W. Shi, Y. D. Luo, X. C. Luo, L. Chao, H. Zhang, J. Wang and A. W. Lei, *J. Am. Chem. Soc.* 2008, **130**, 14713; (h) W. Yin, C. He, M. Chen, H. Zhang and A. Lei, *Org. Lett.* 2009, **11**, 709; (i) Y. Weng, B. Cheng, C. He and A. Lei, *Angew. Chem., Int. Ed.* 2012, **51**, 9547; (j) G. Zhang, H. Yi, G. Zhang, Y. Deng, R. Bai, H. Zhang, J. T. Miller, A. J. Kropf, E. E. Bunel and A. Lei, *J. Am. Chem. Soc.* 2014, **136**, 924.

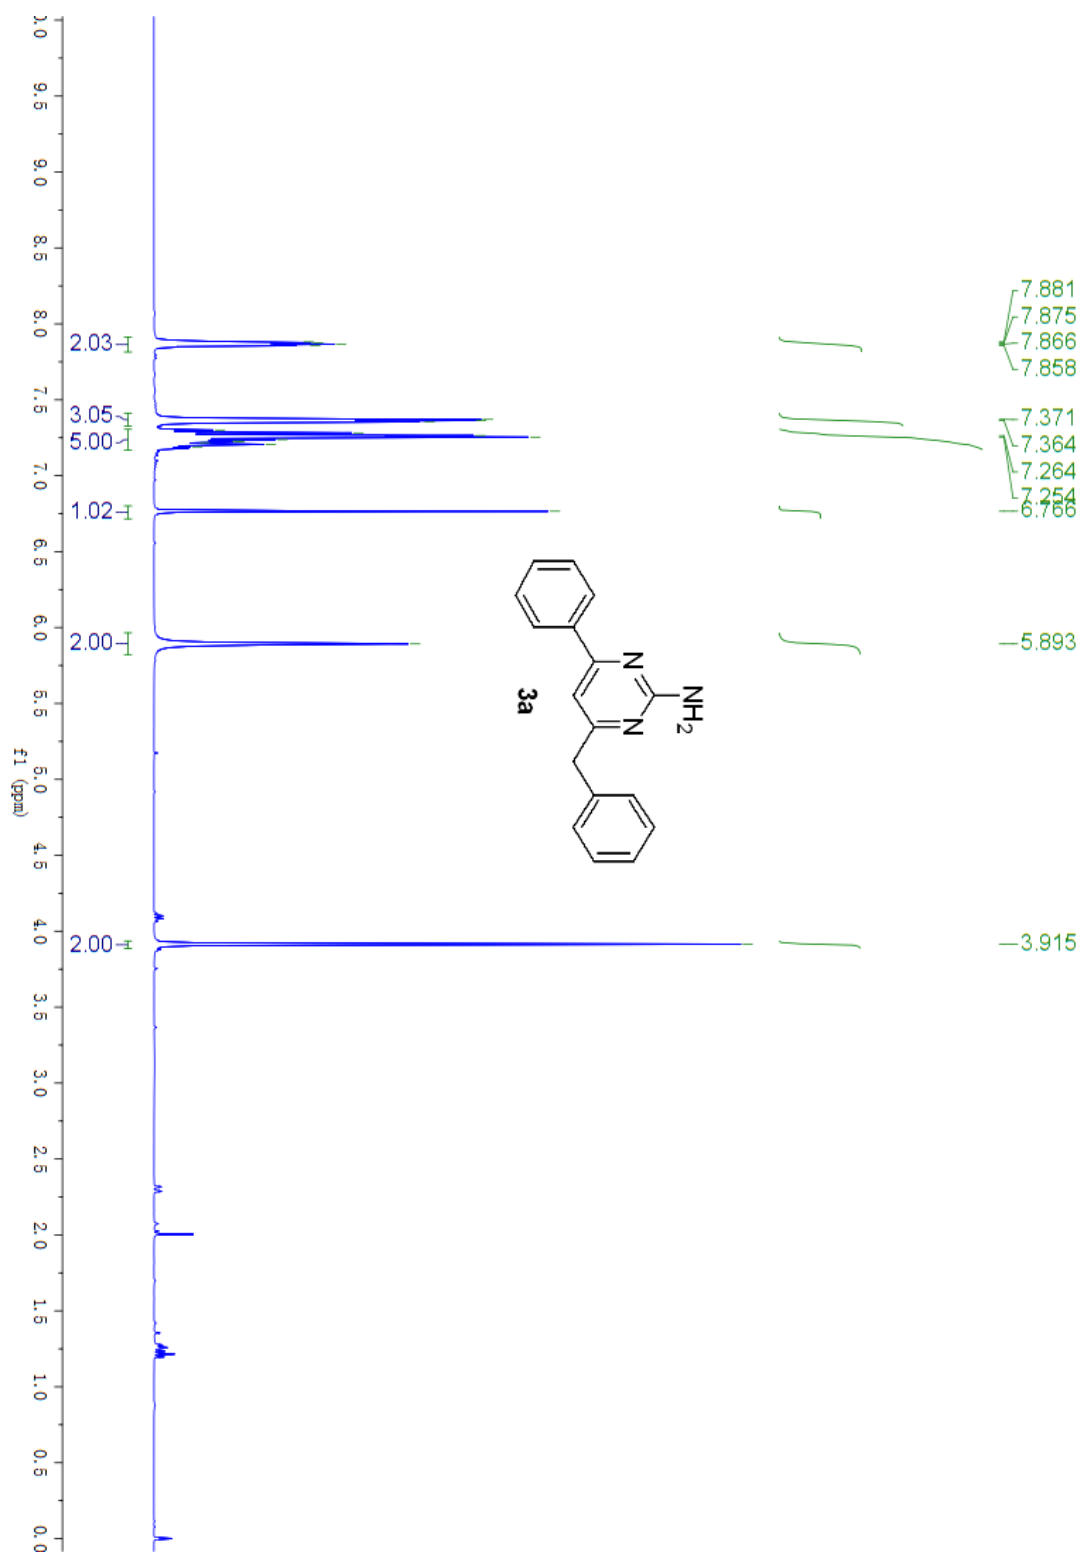

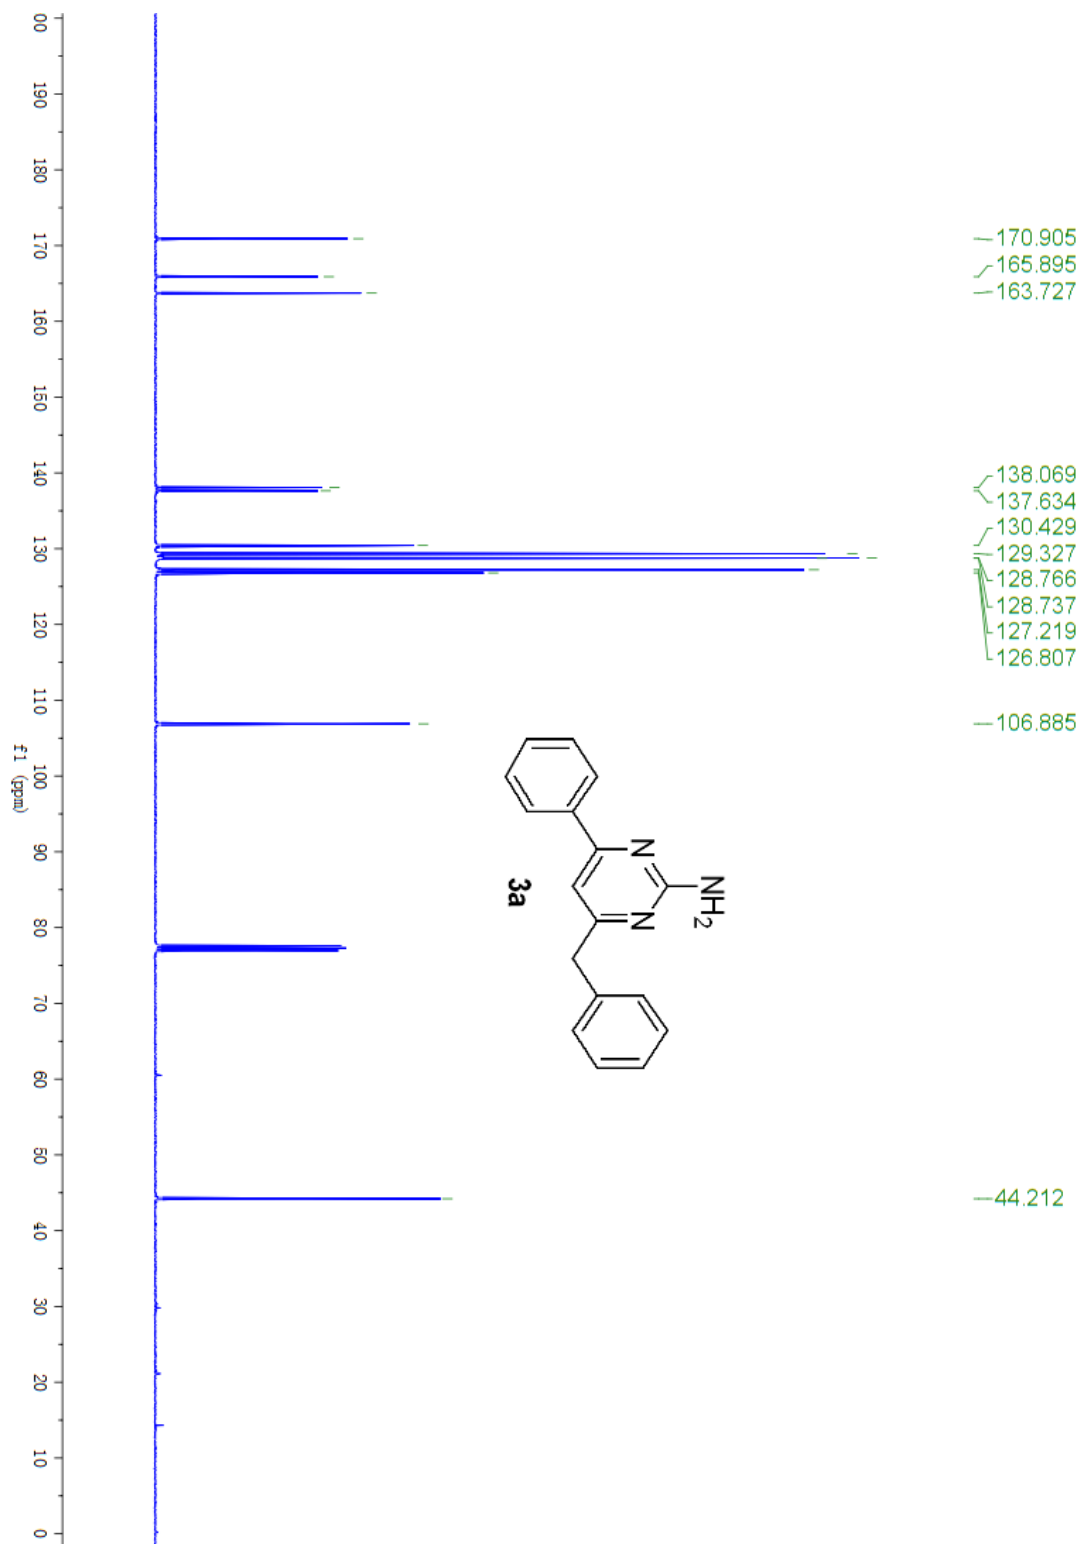



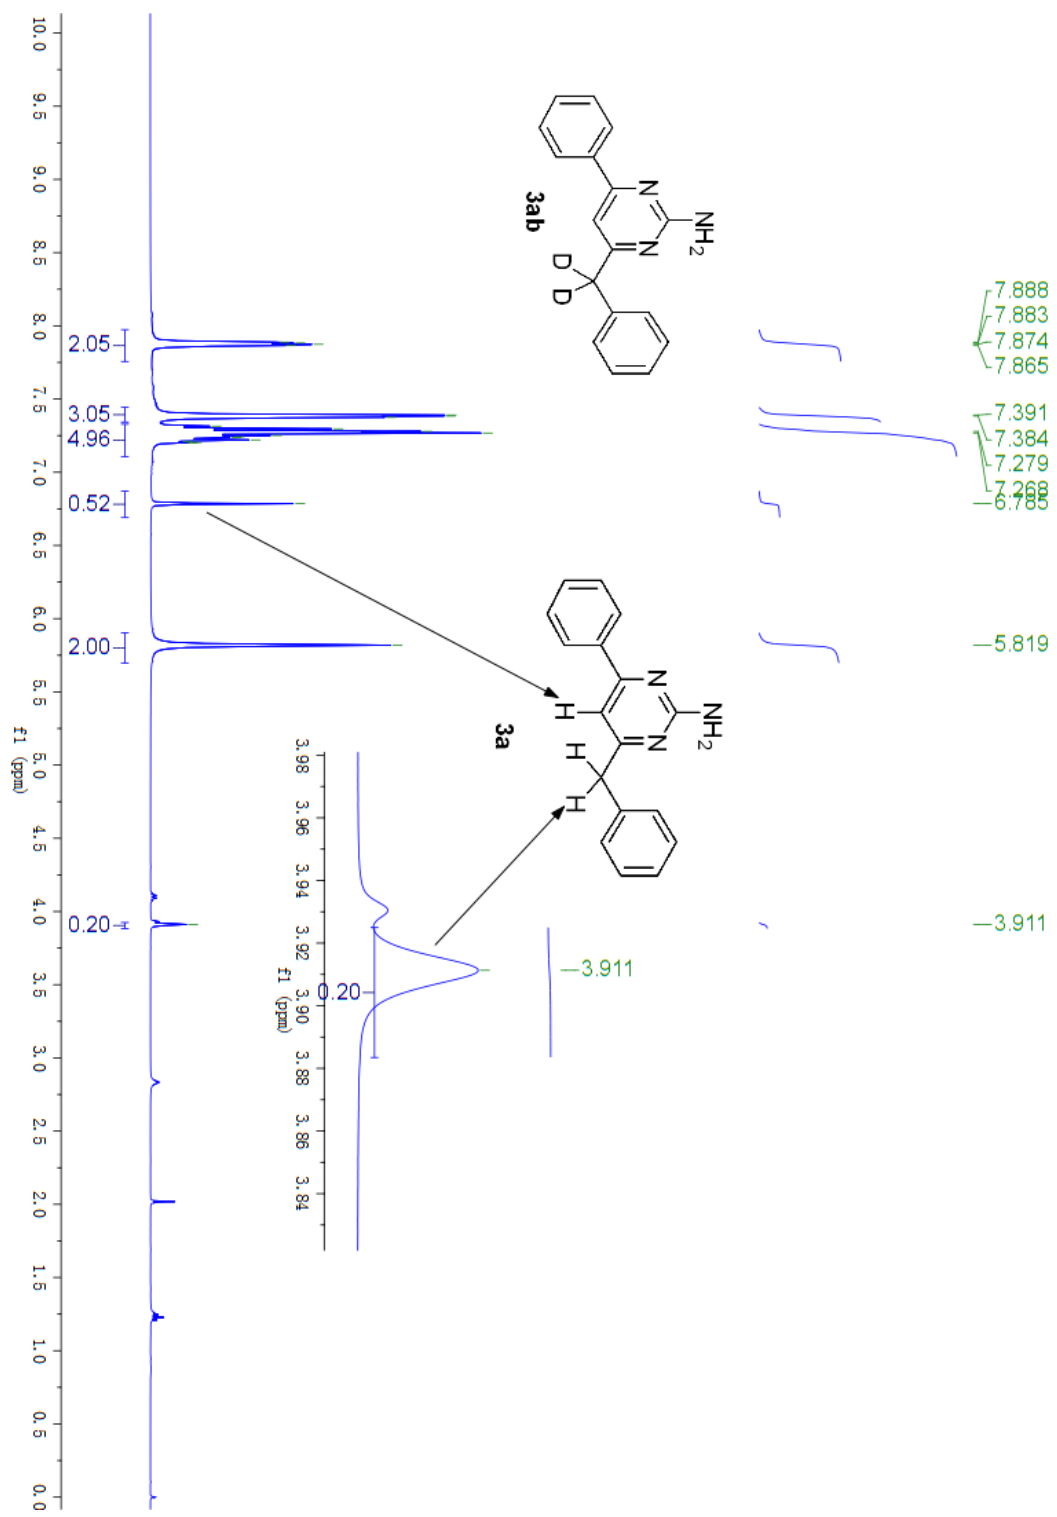

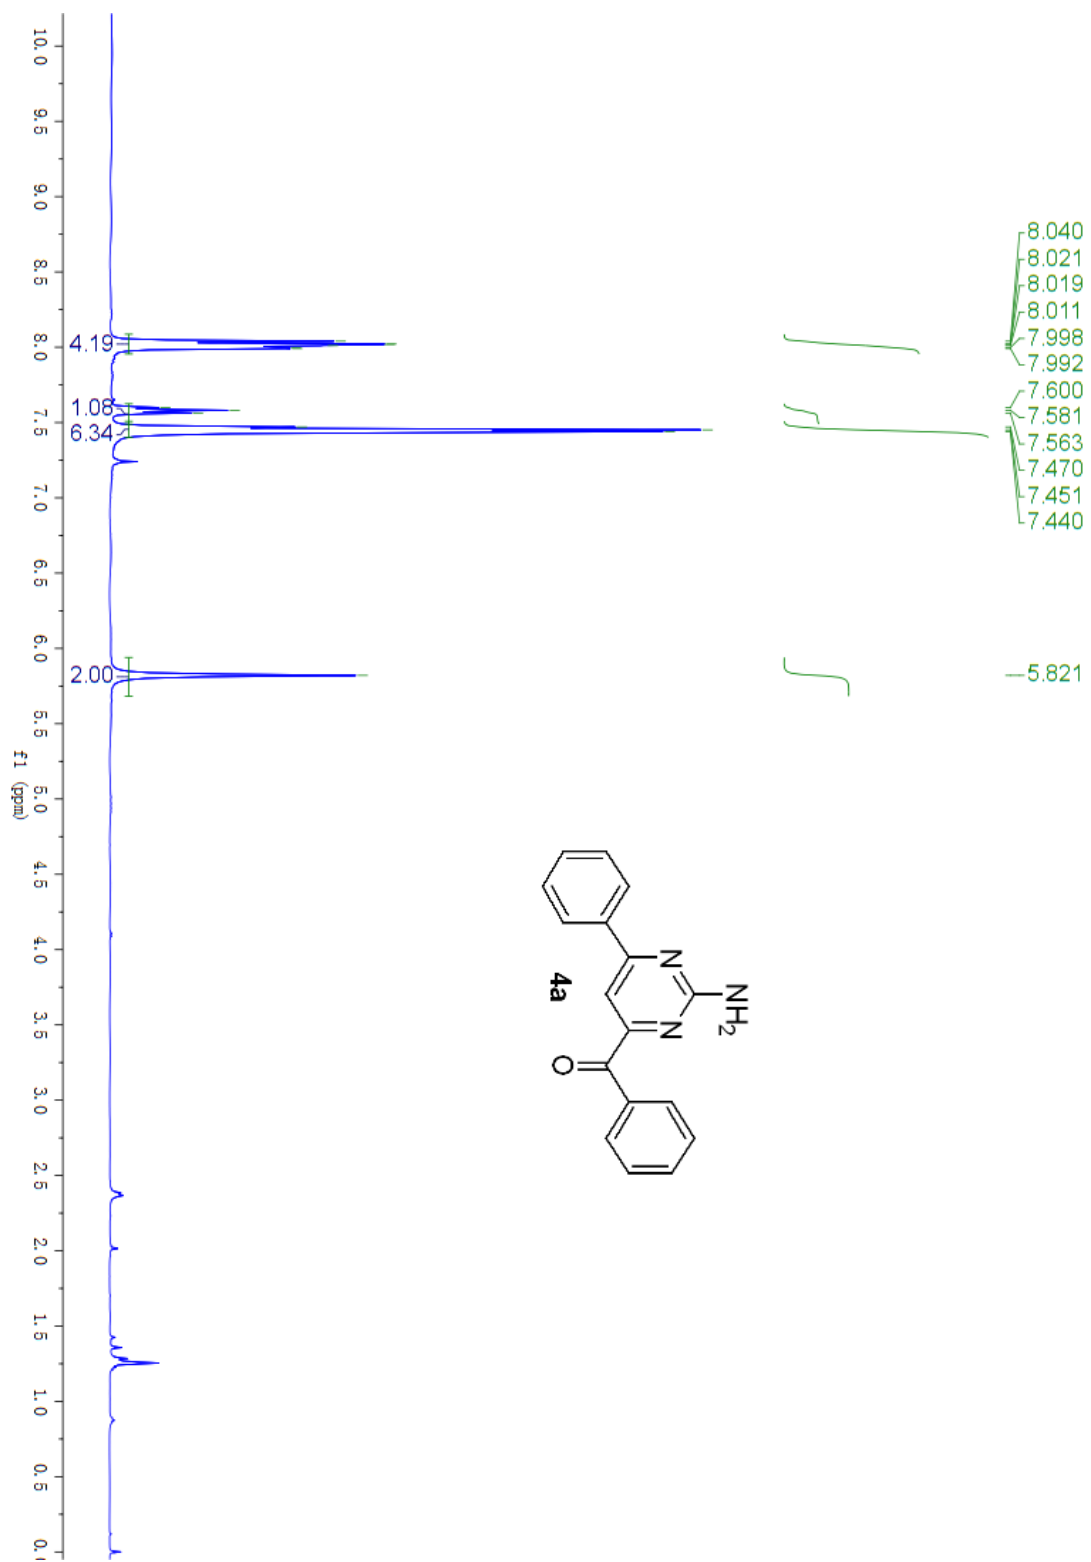

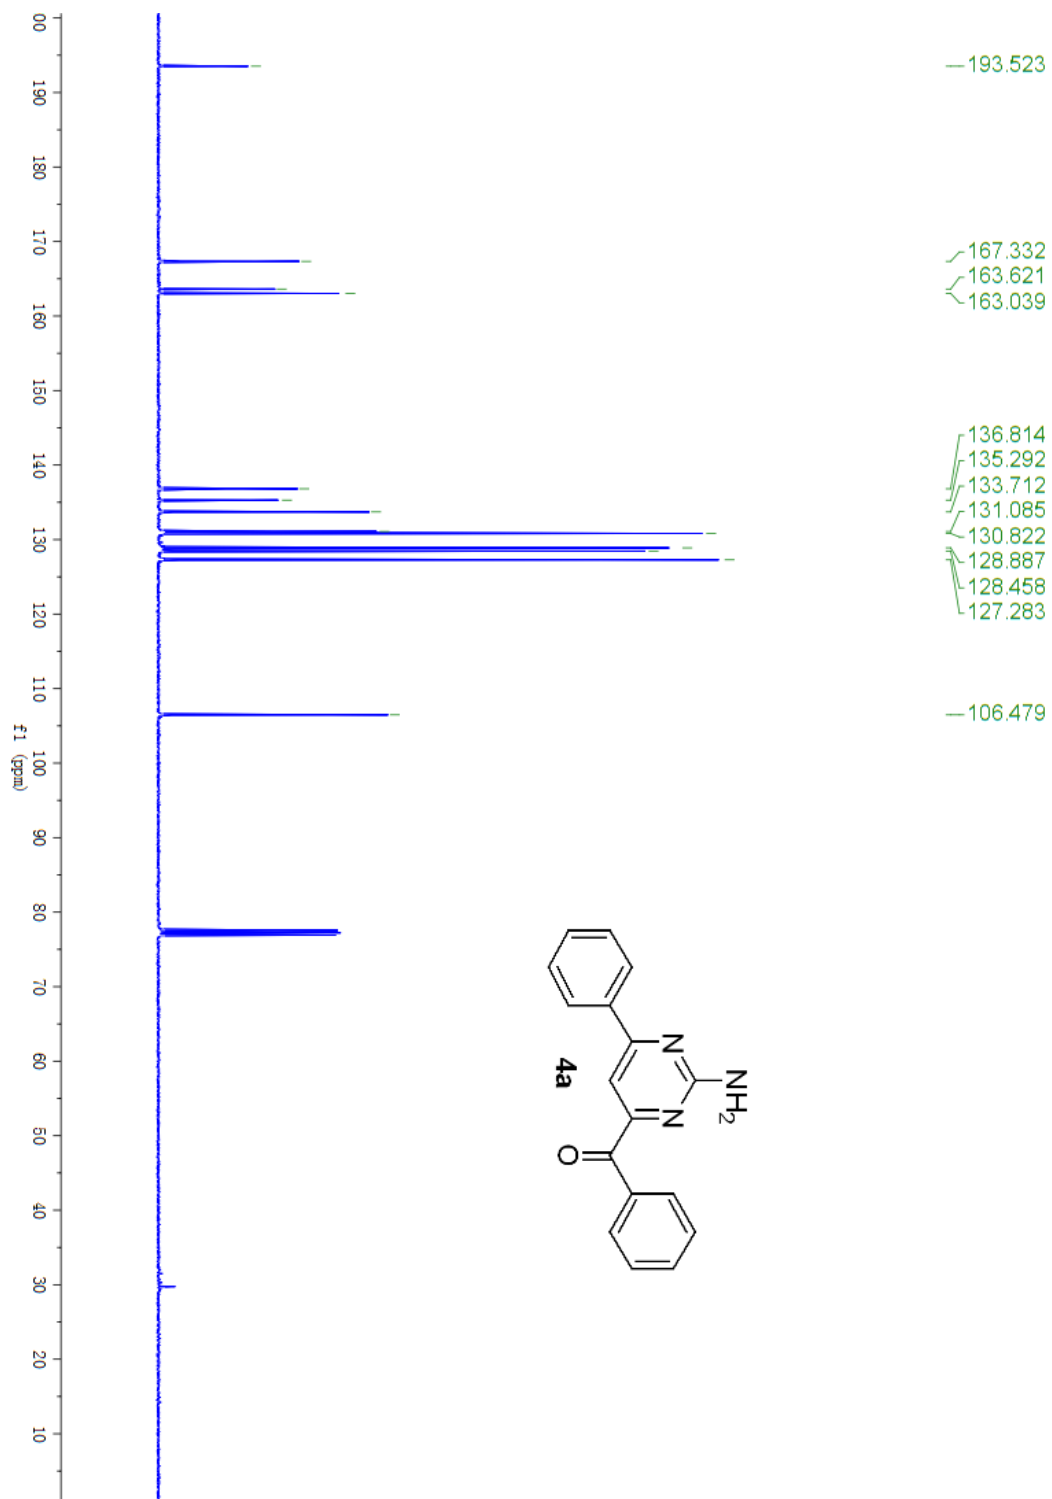

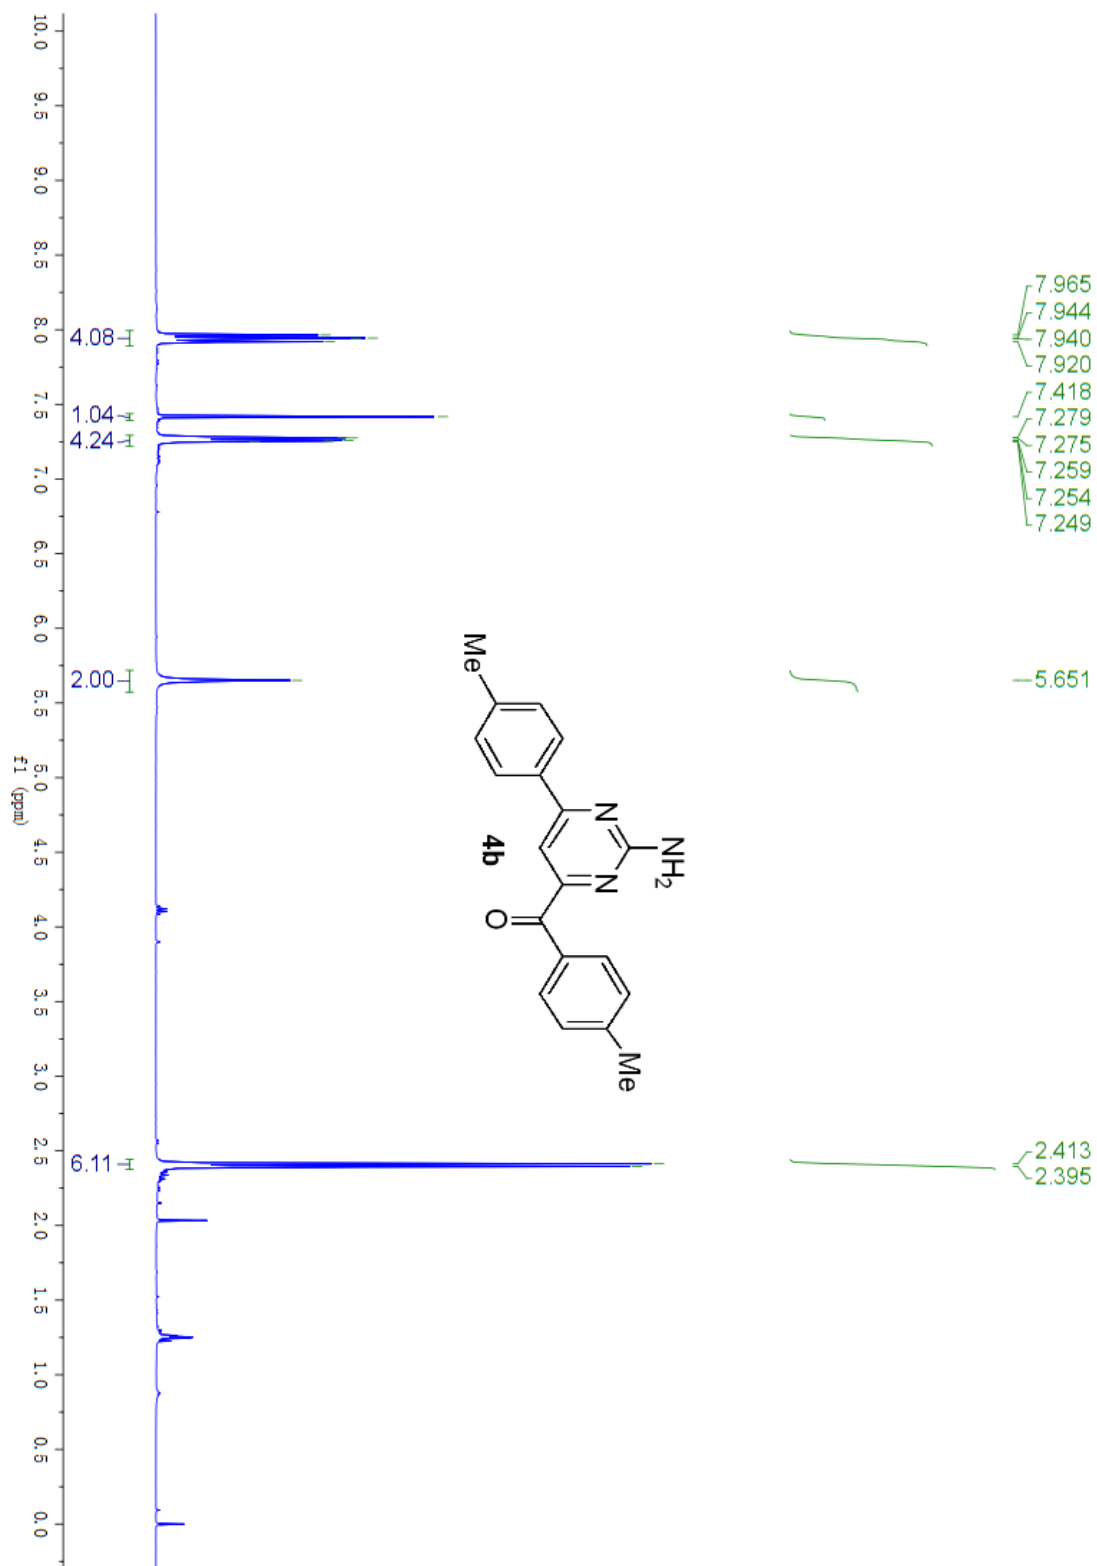

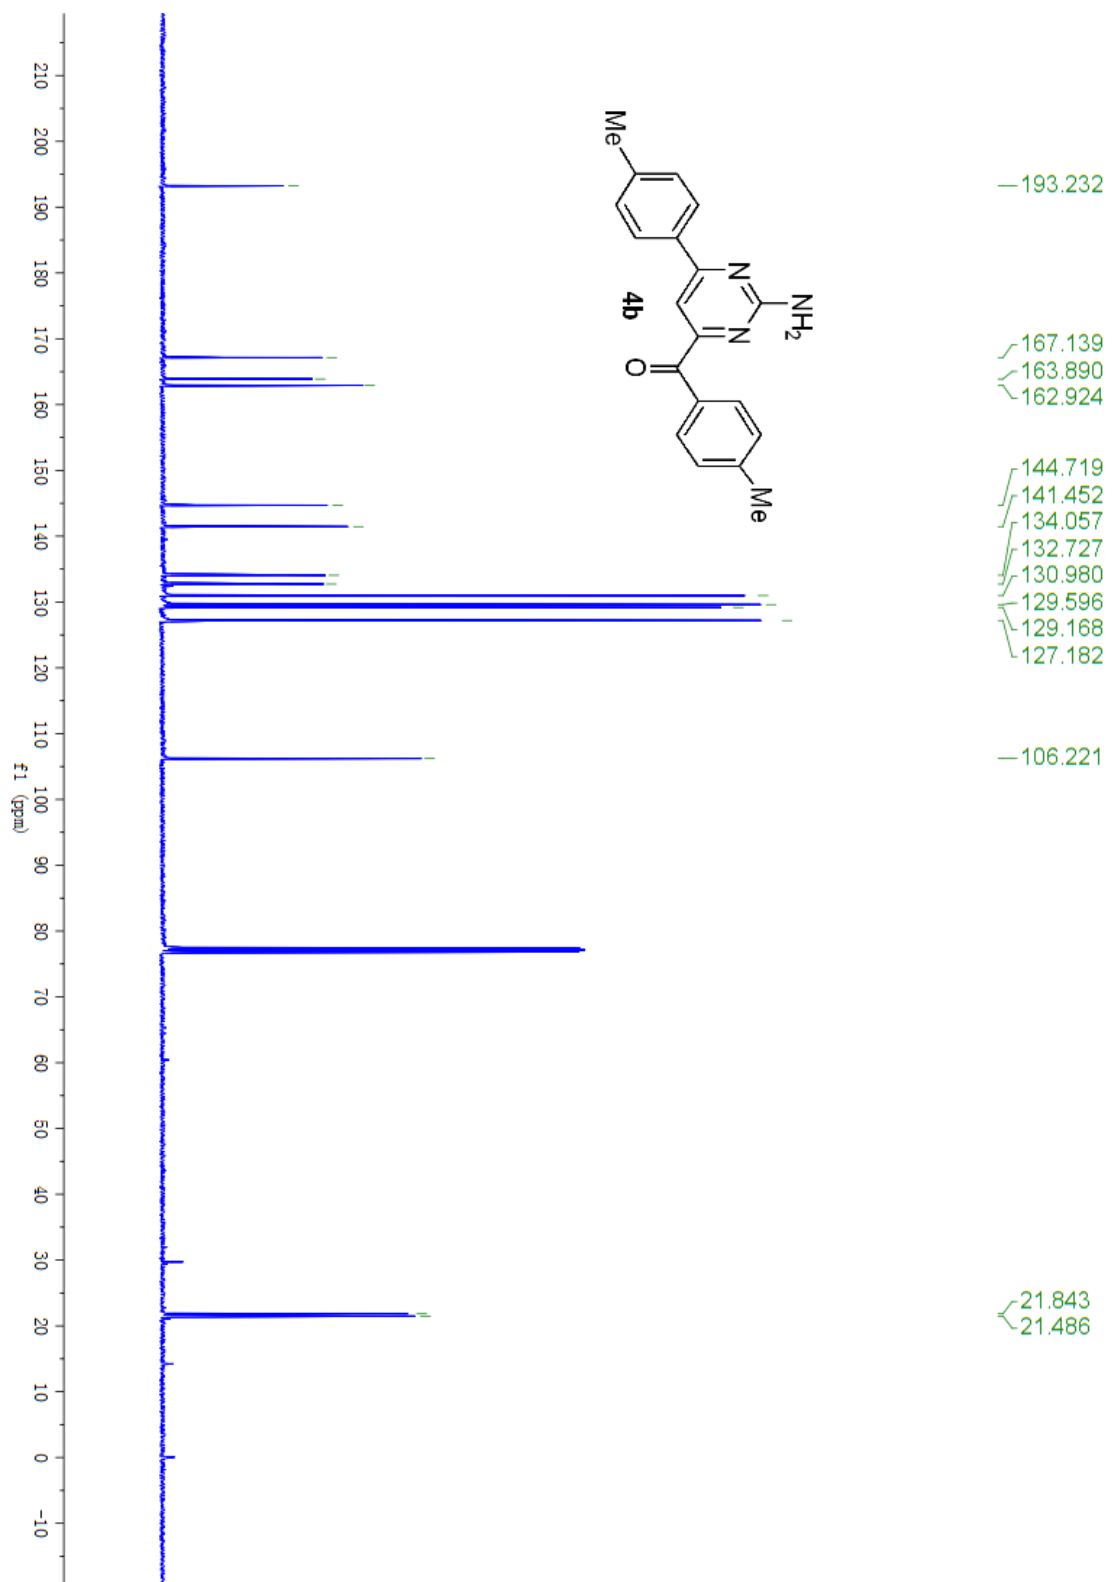

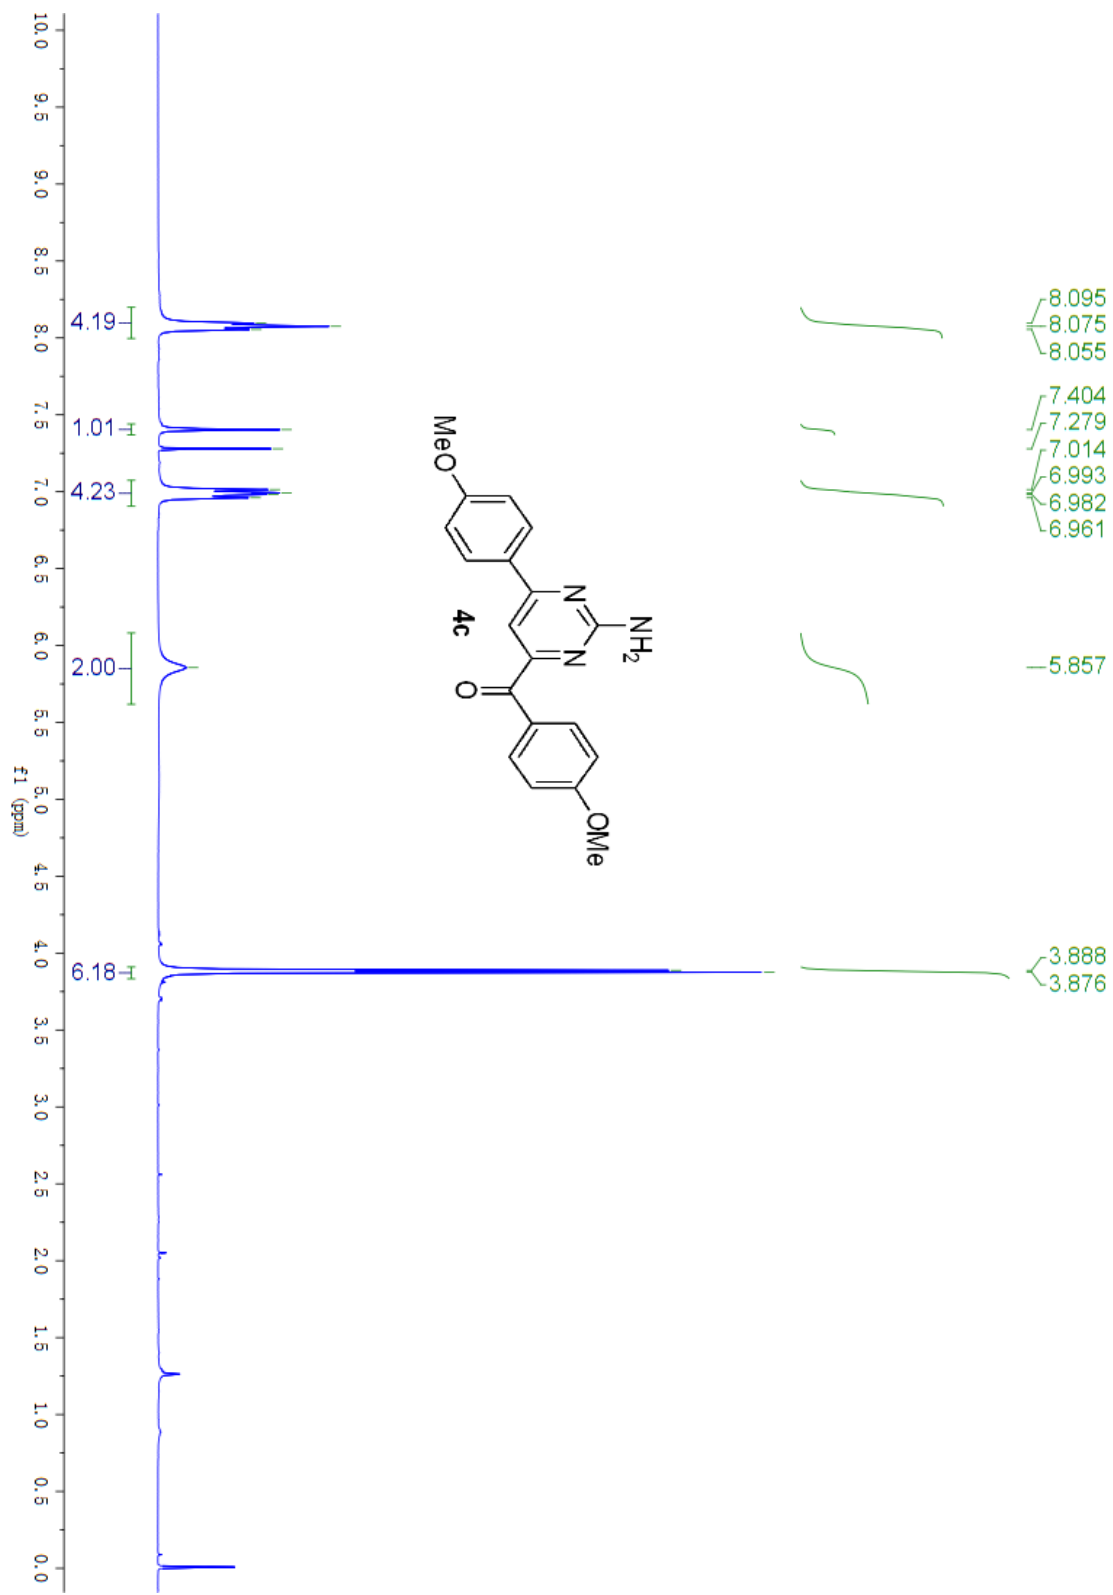

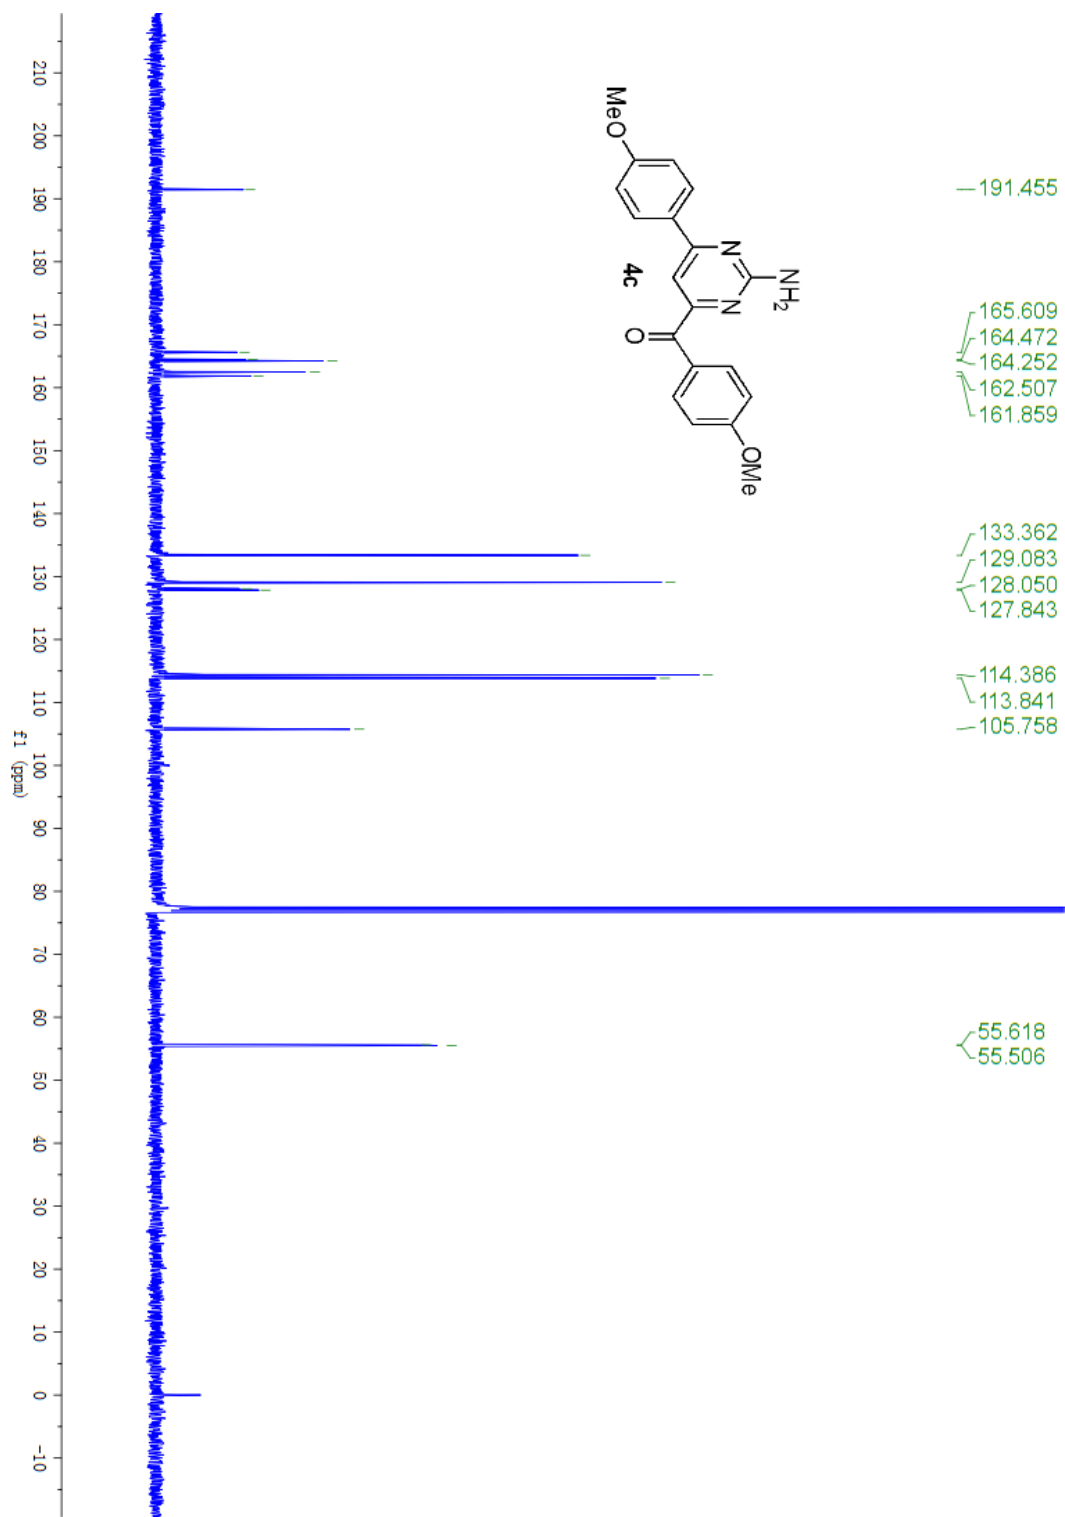

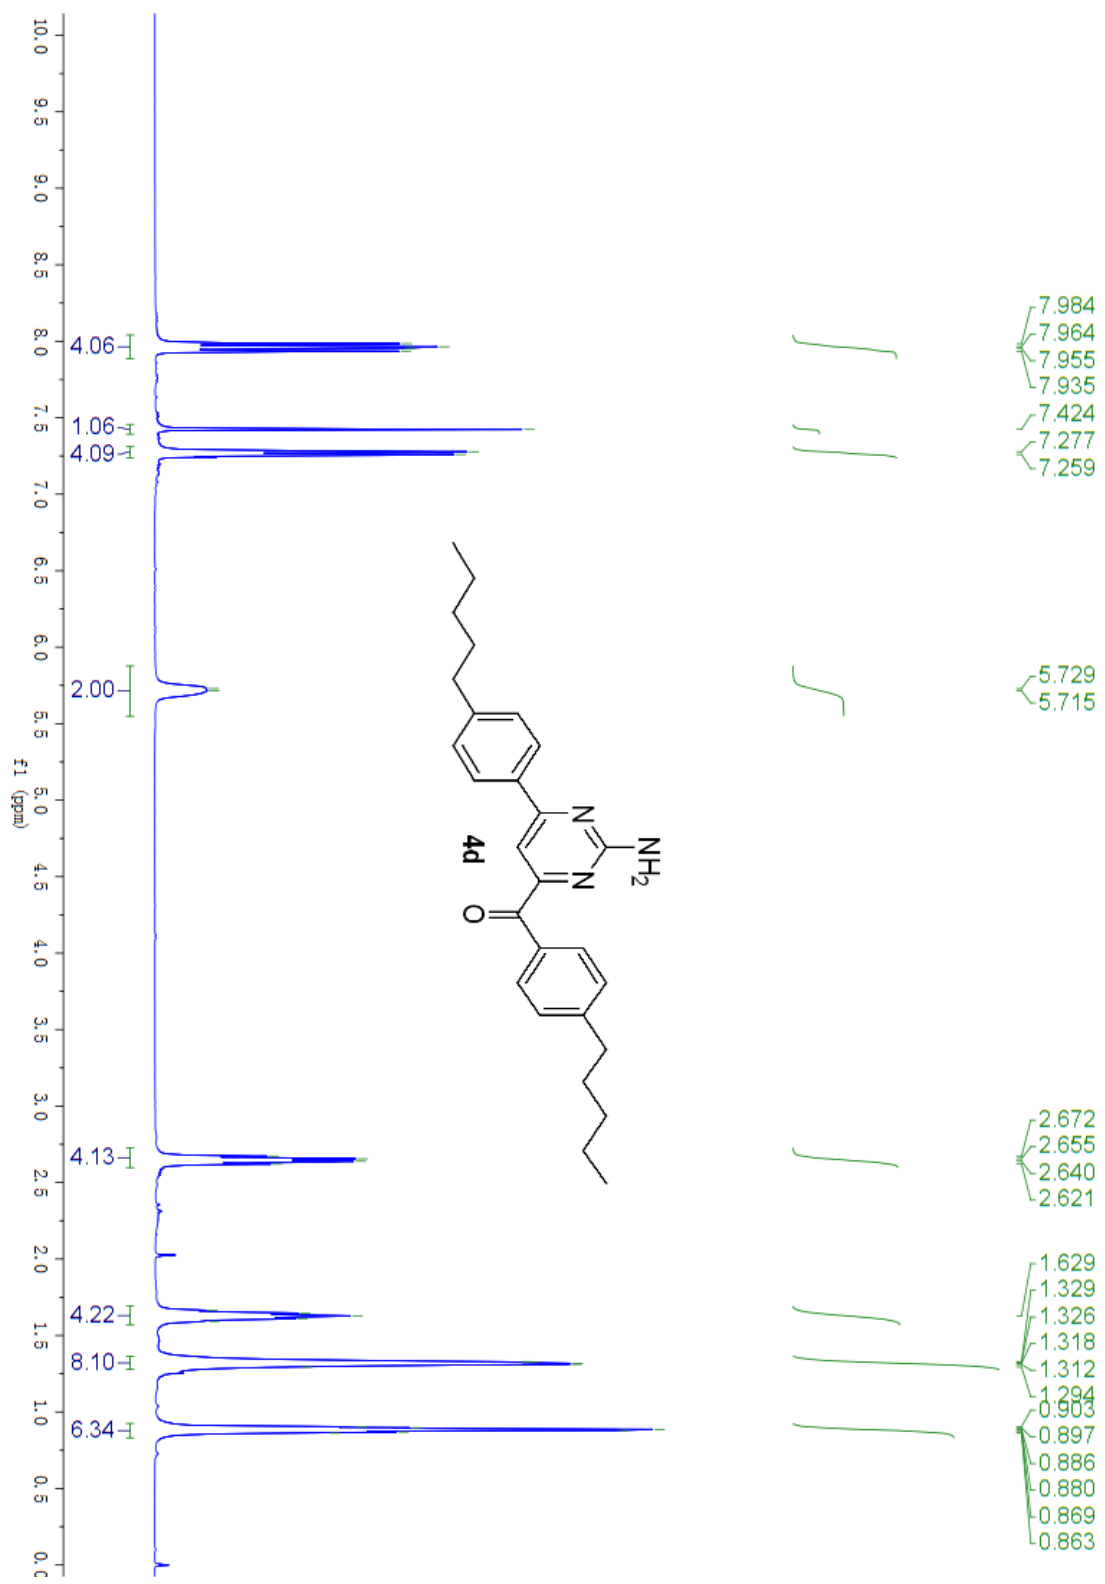



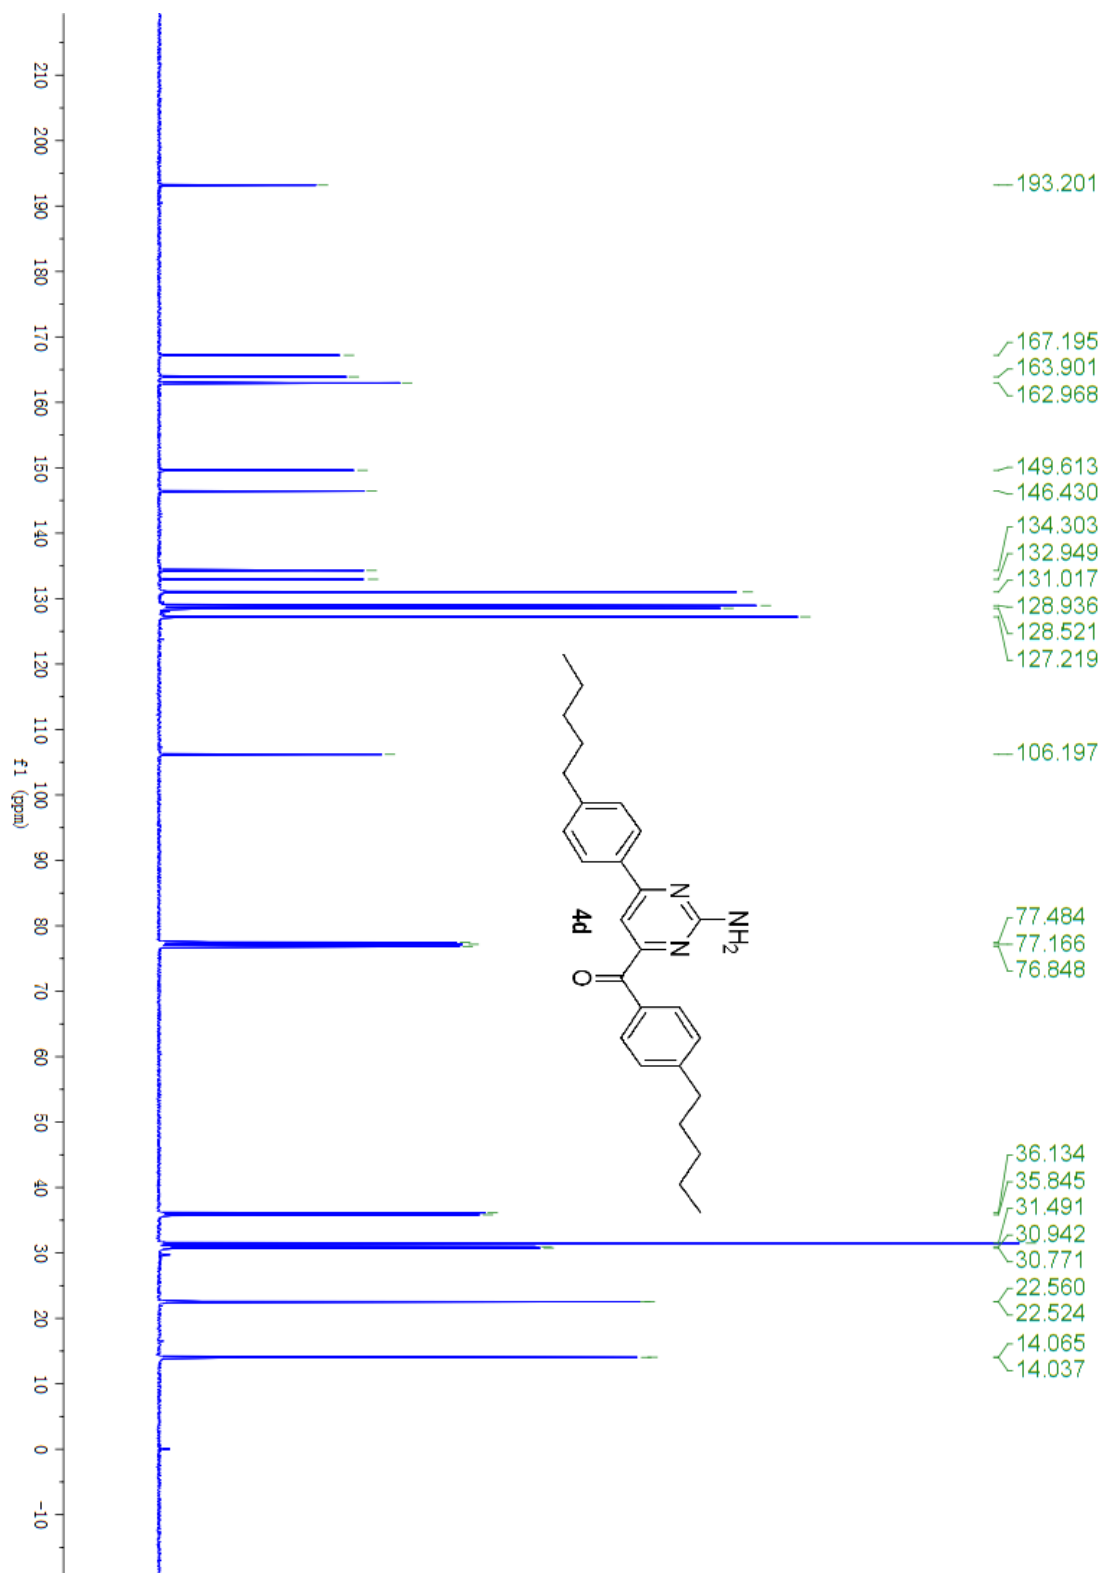

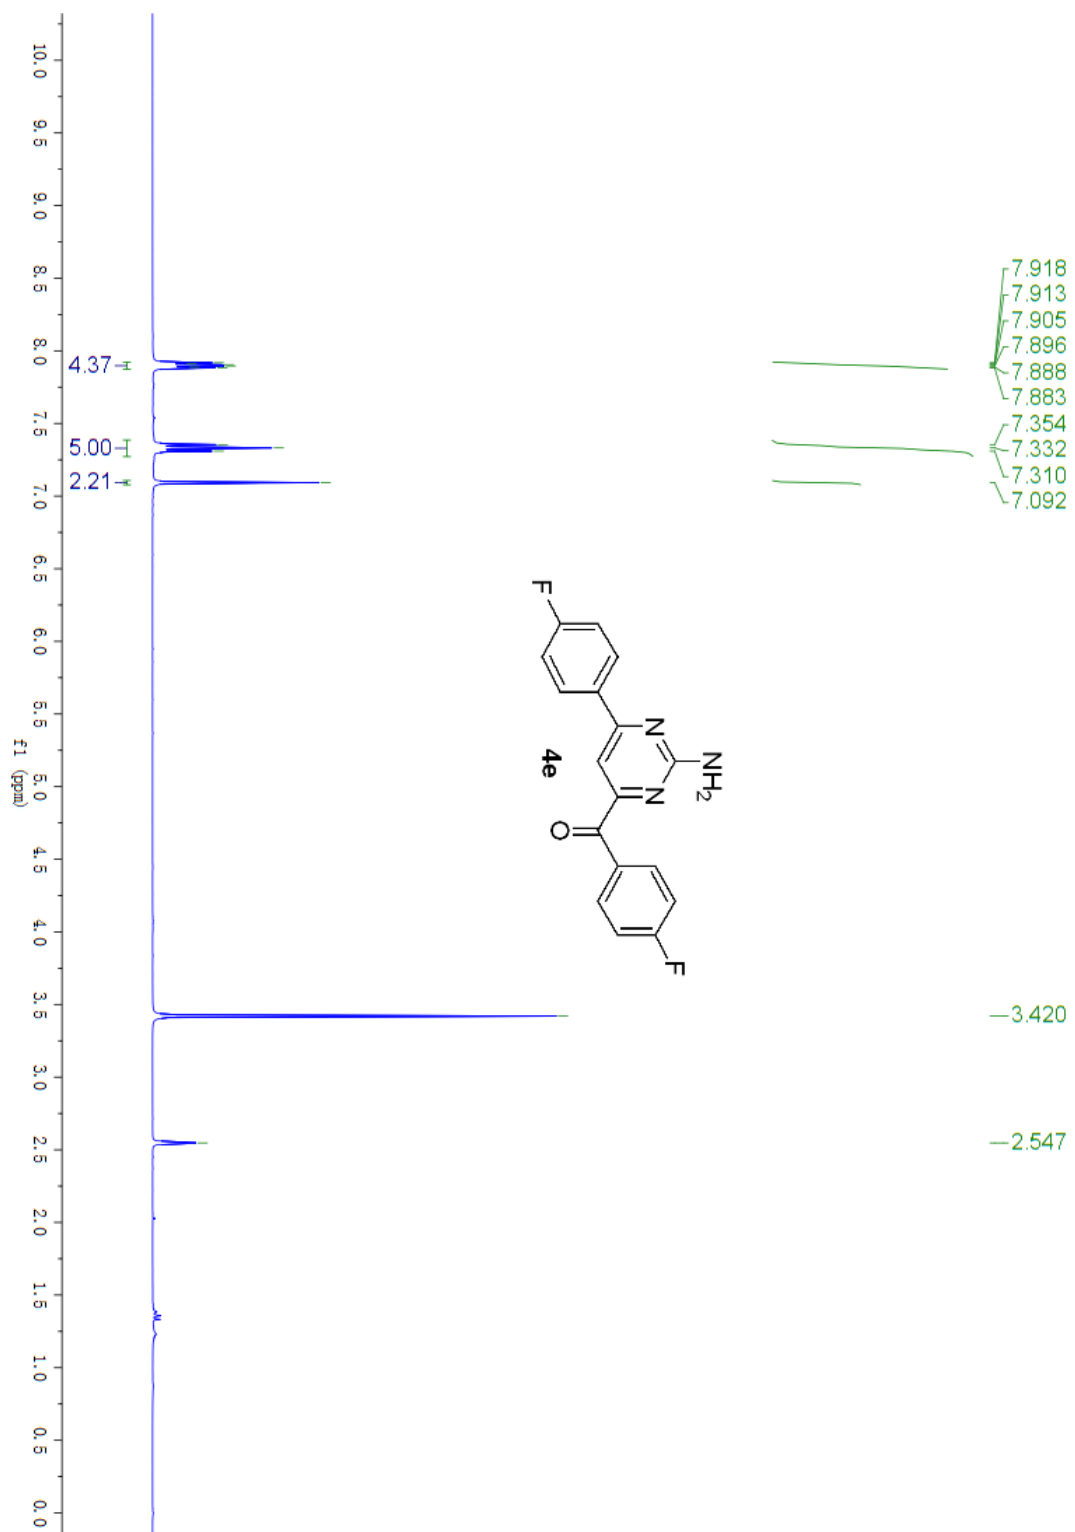

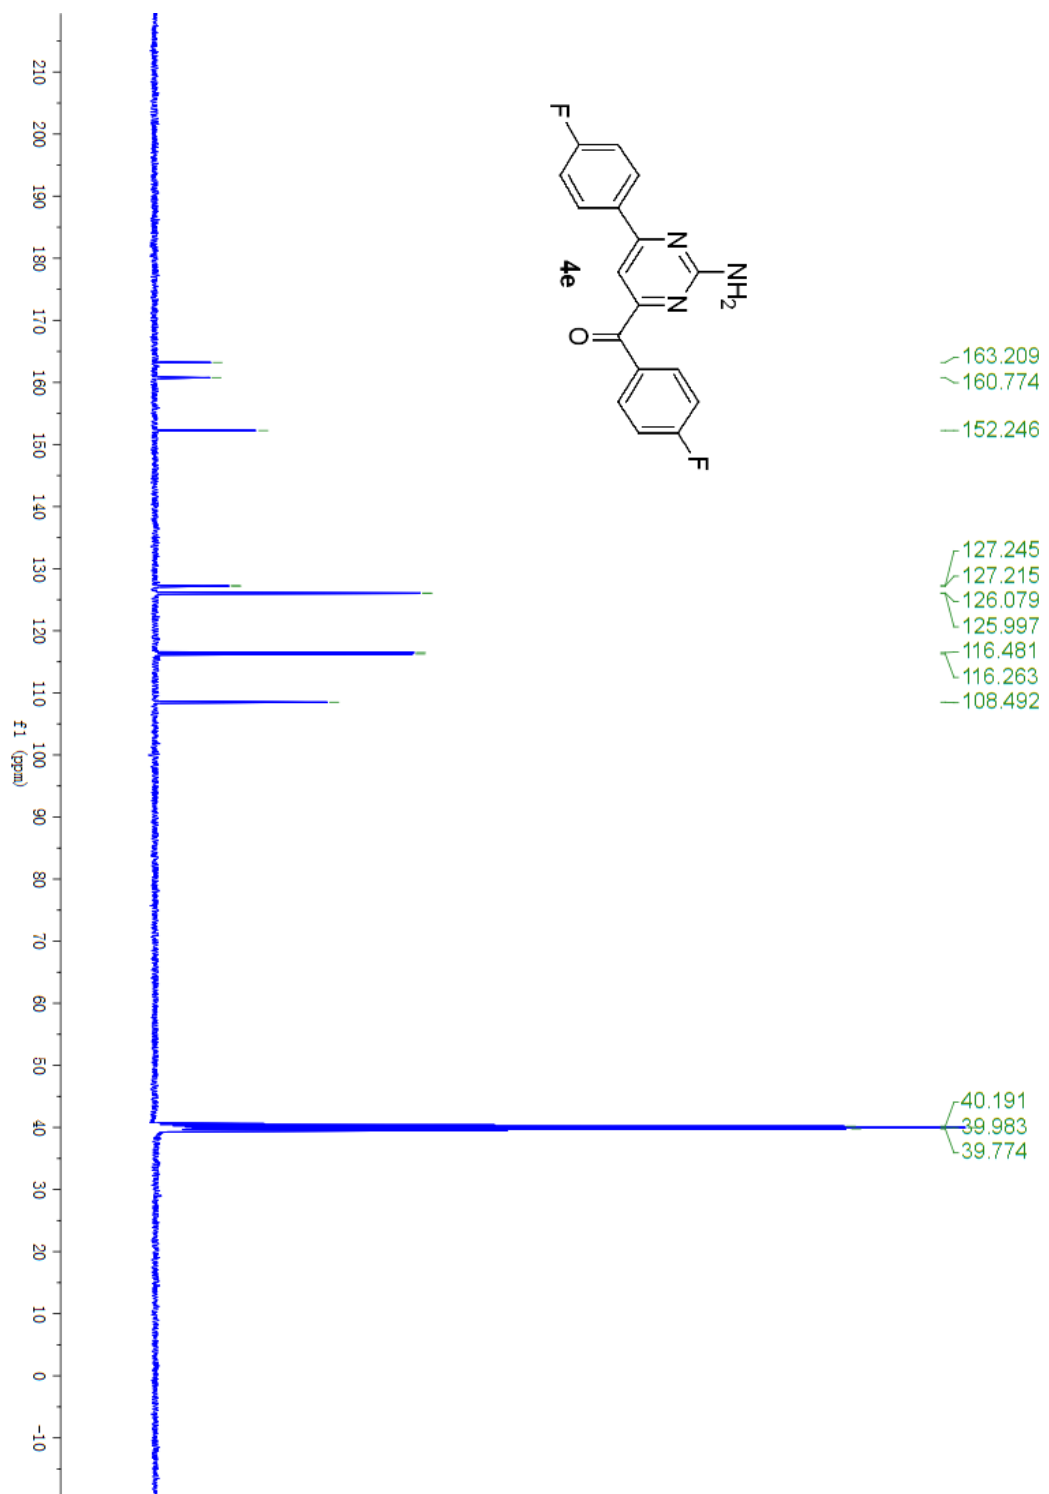

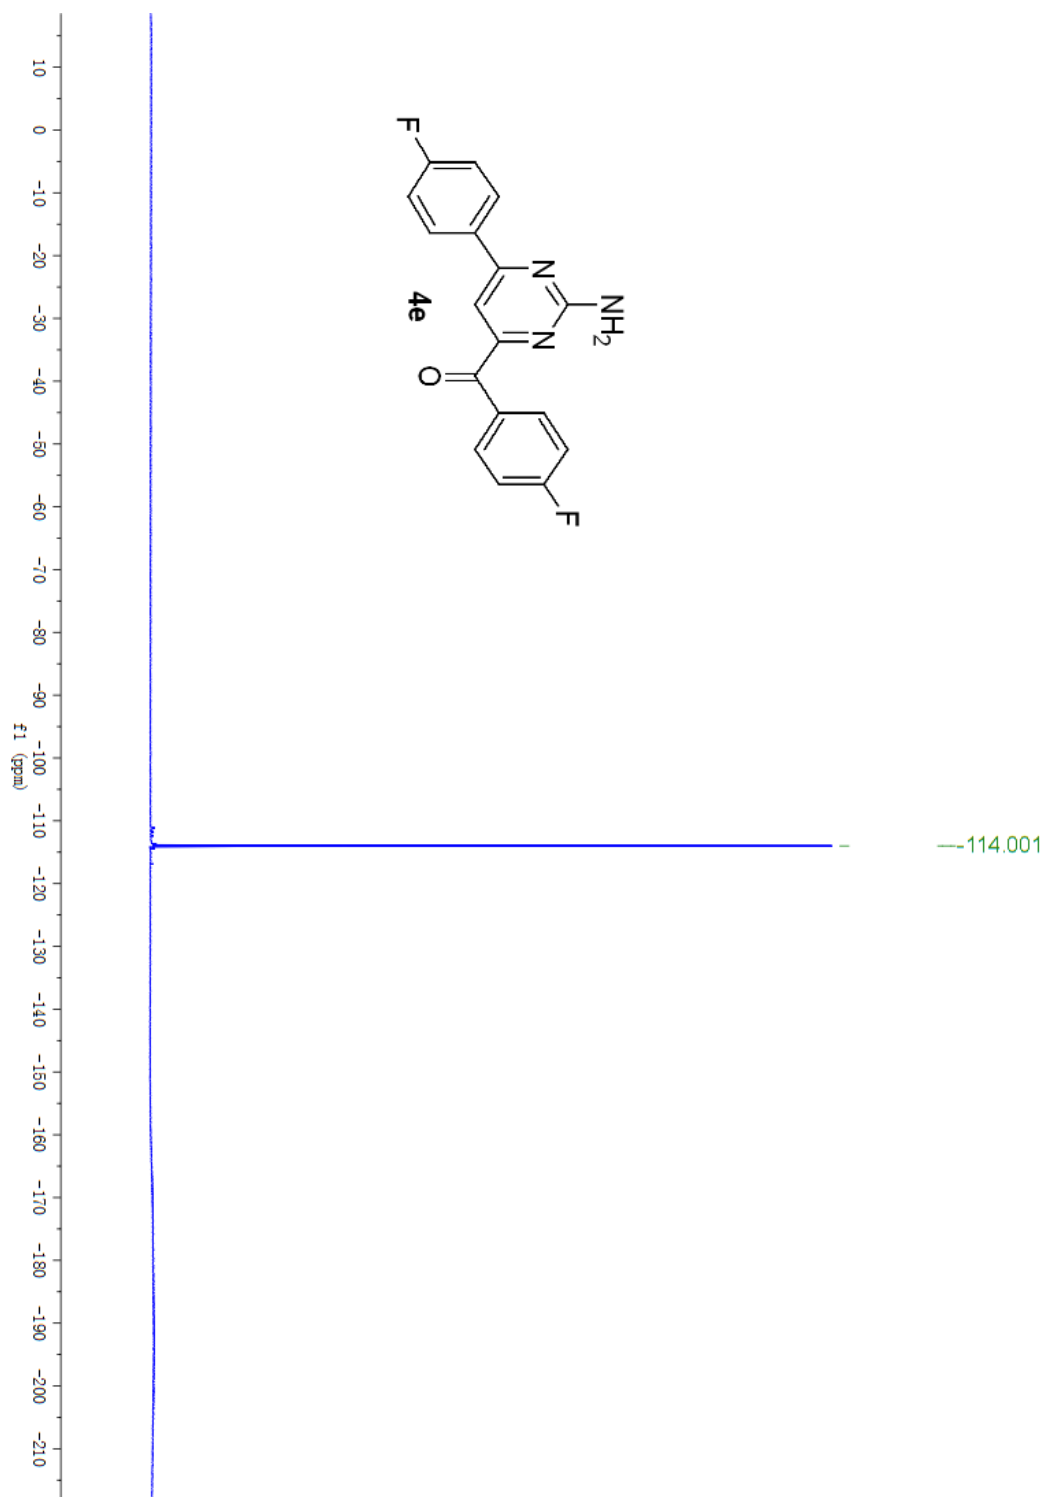

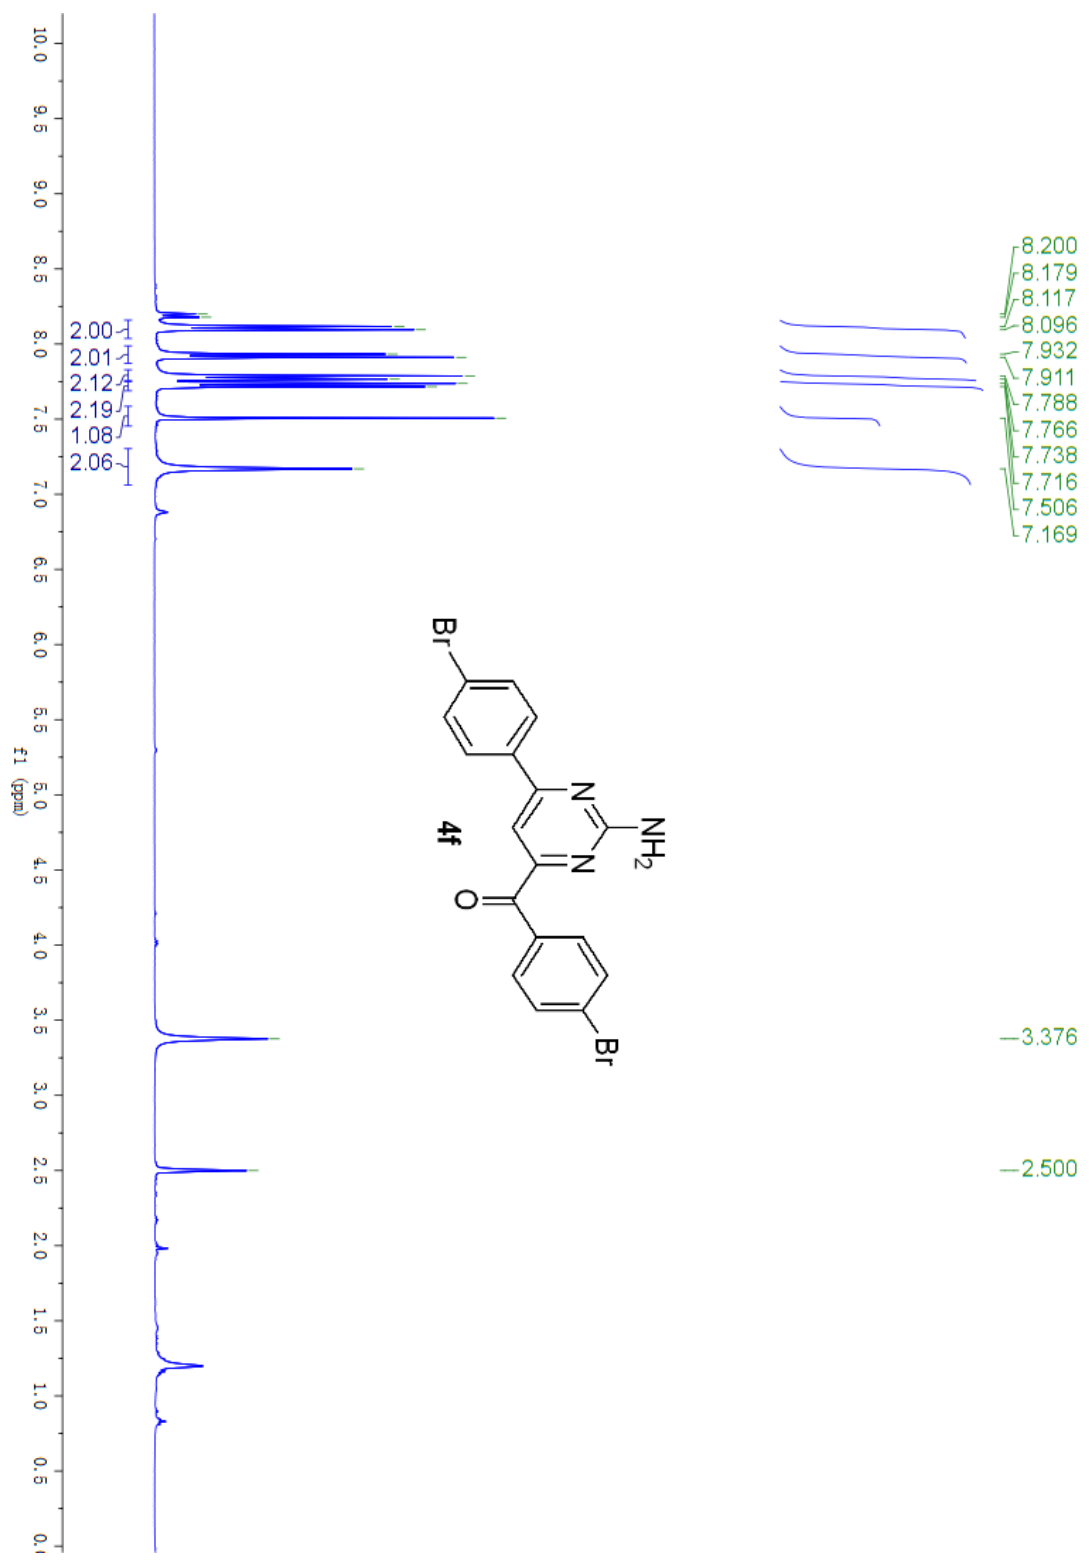

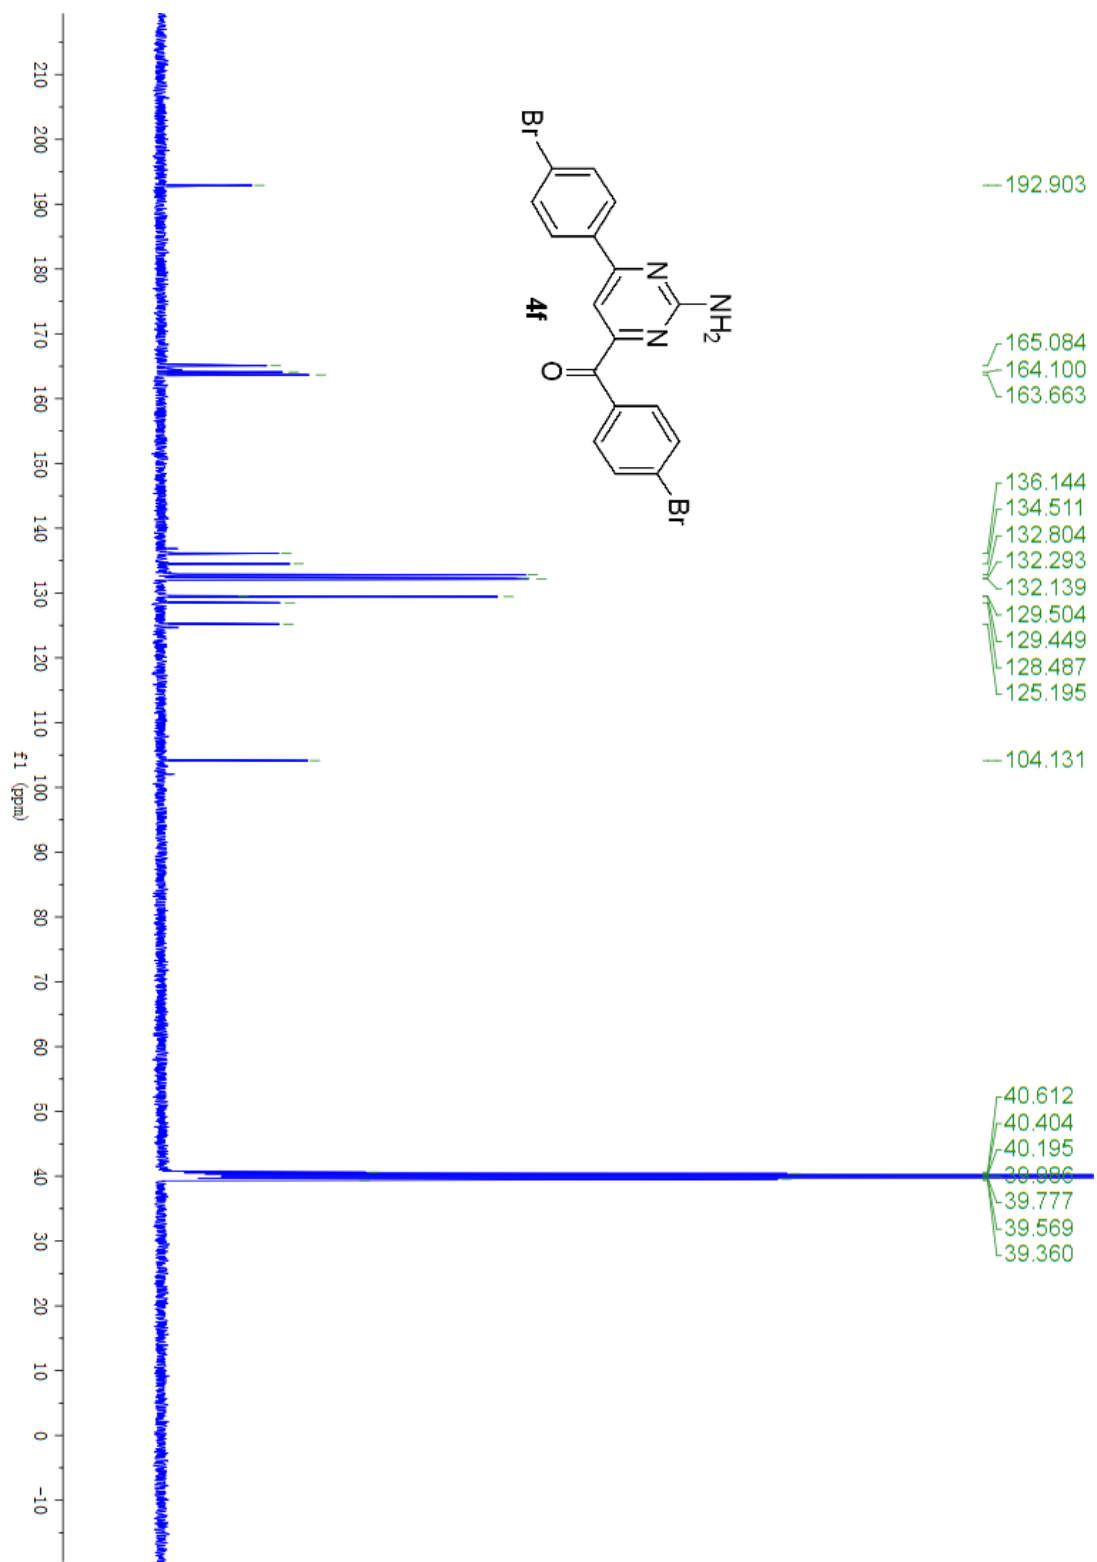

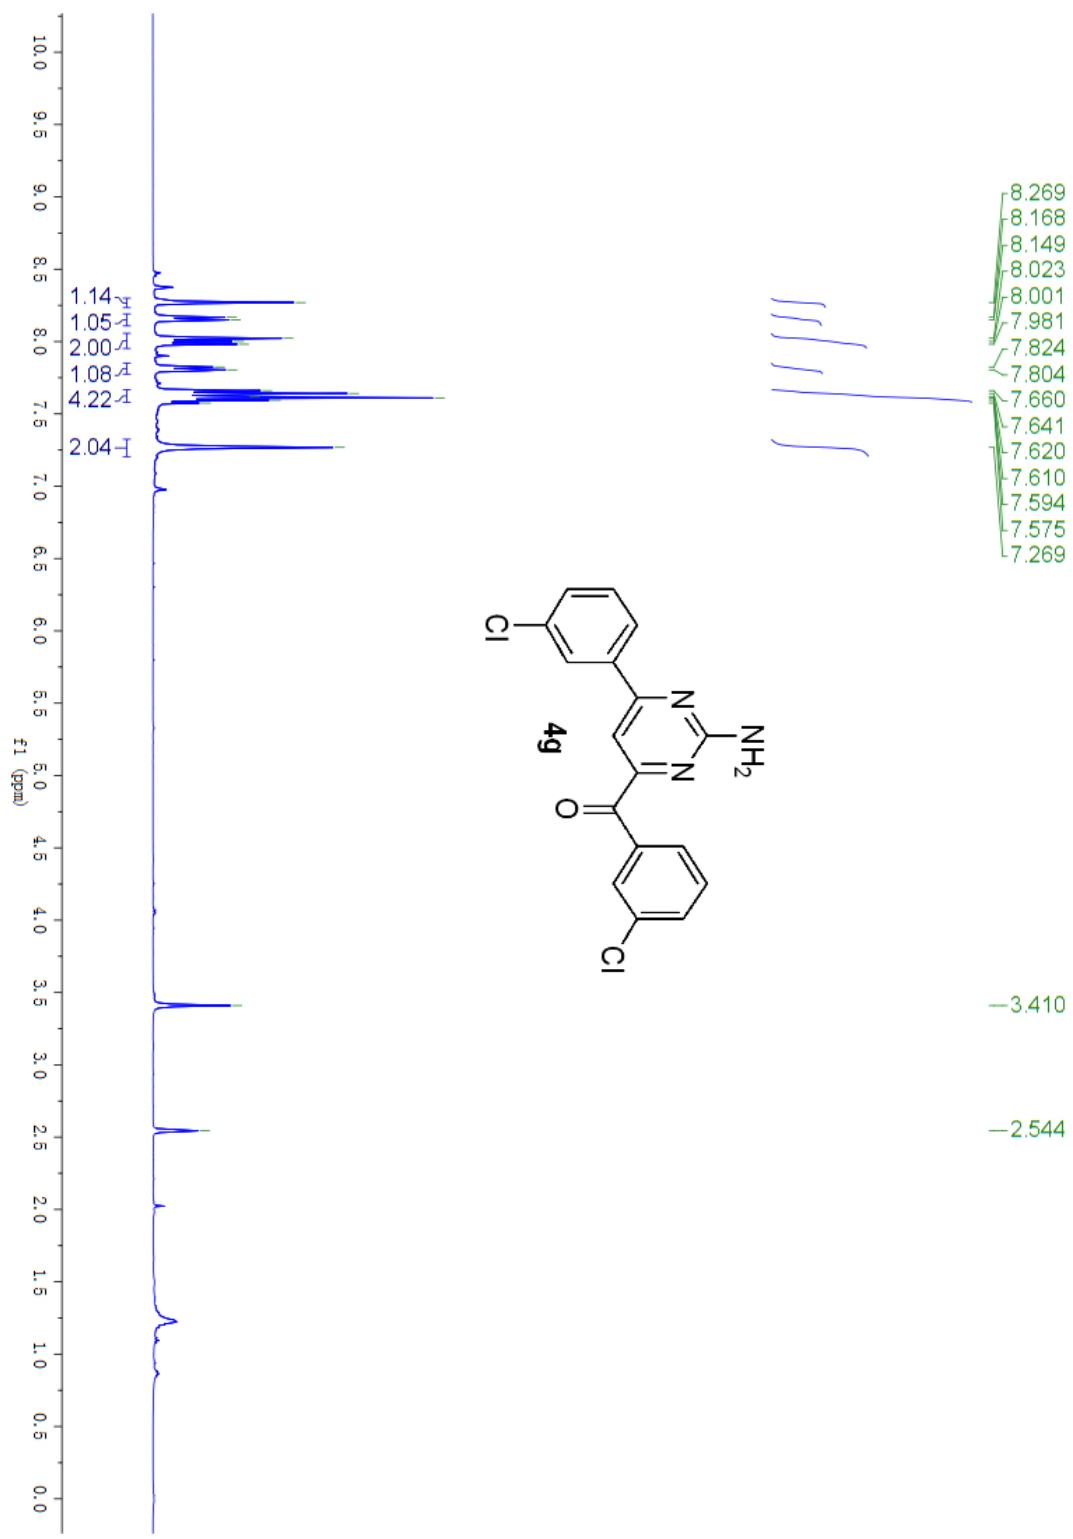

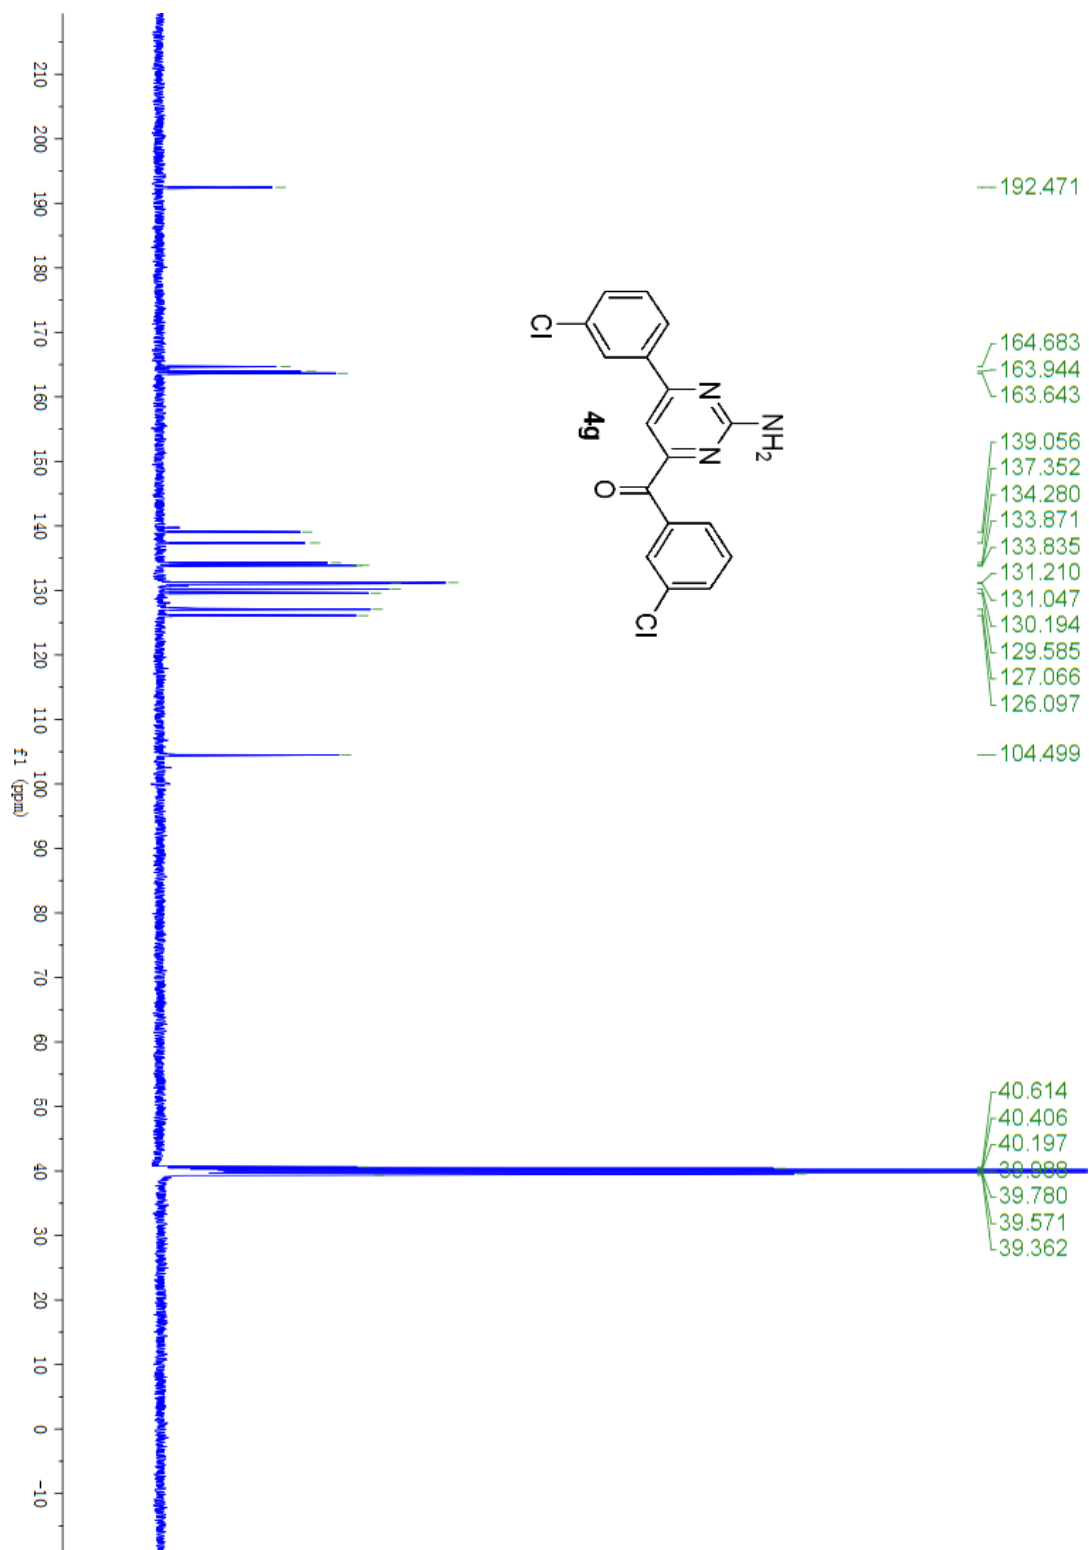



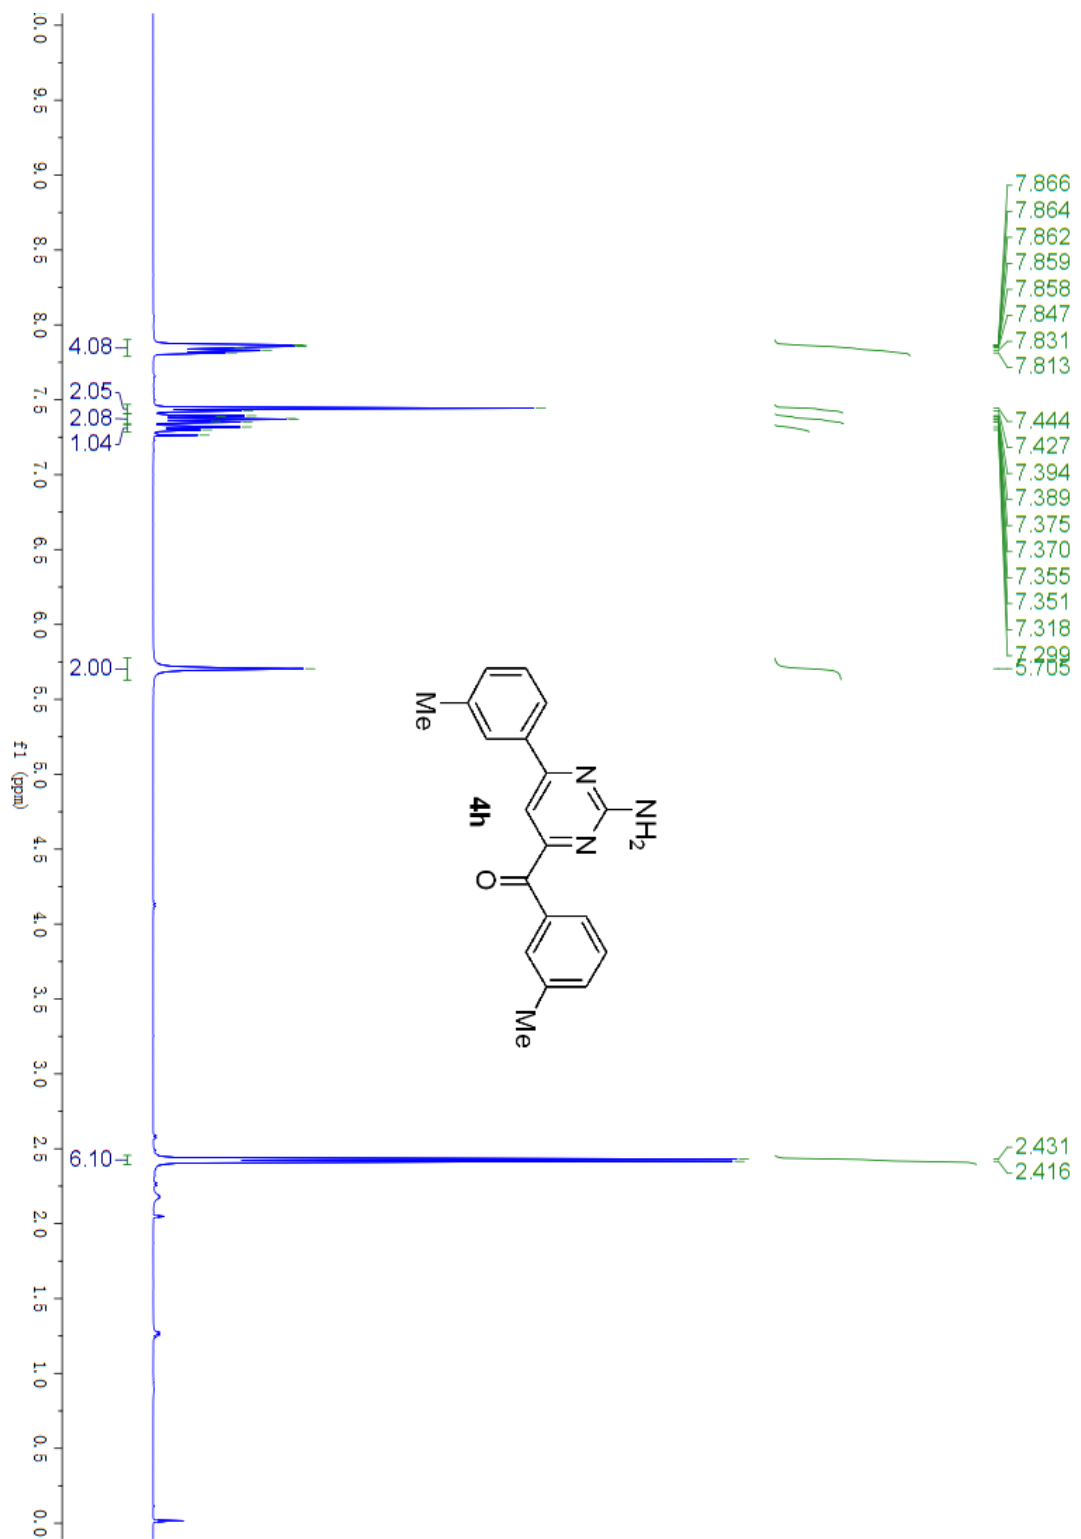

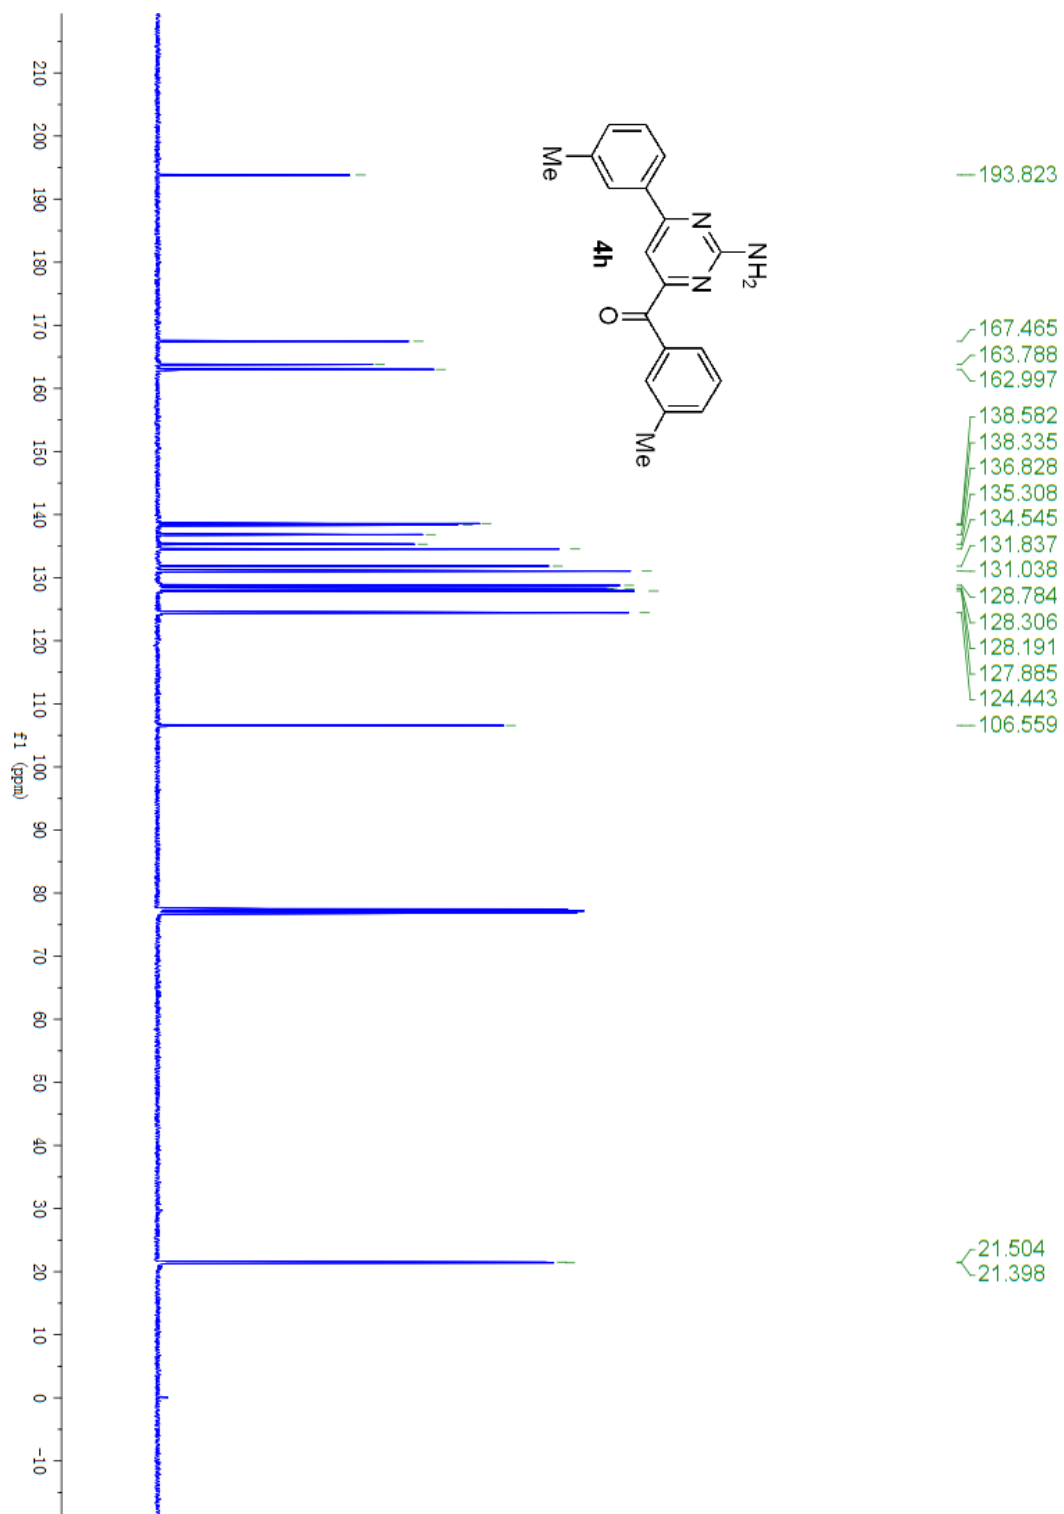

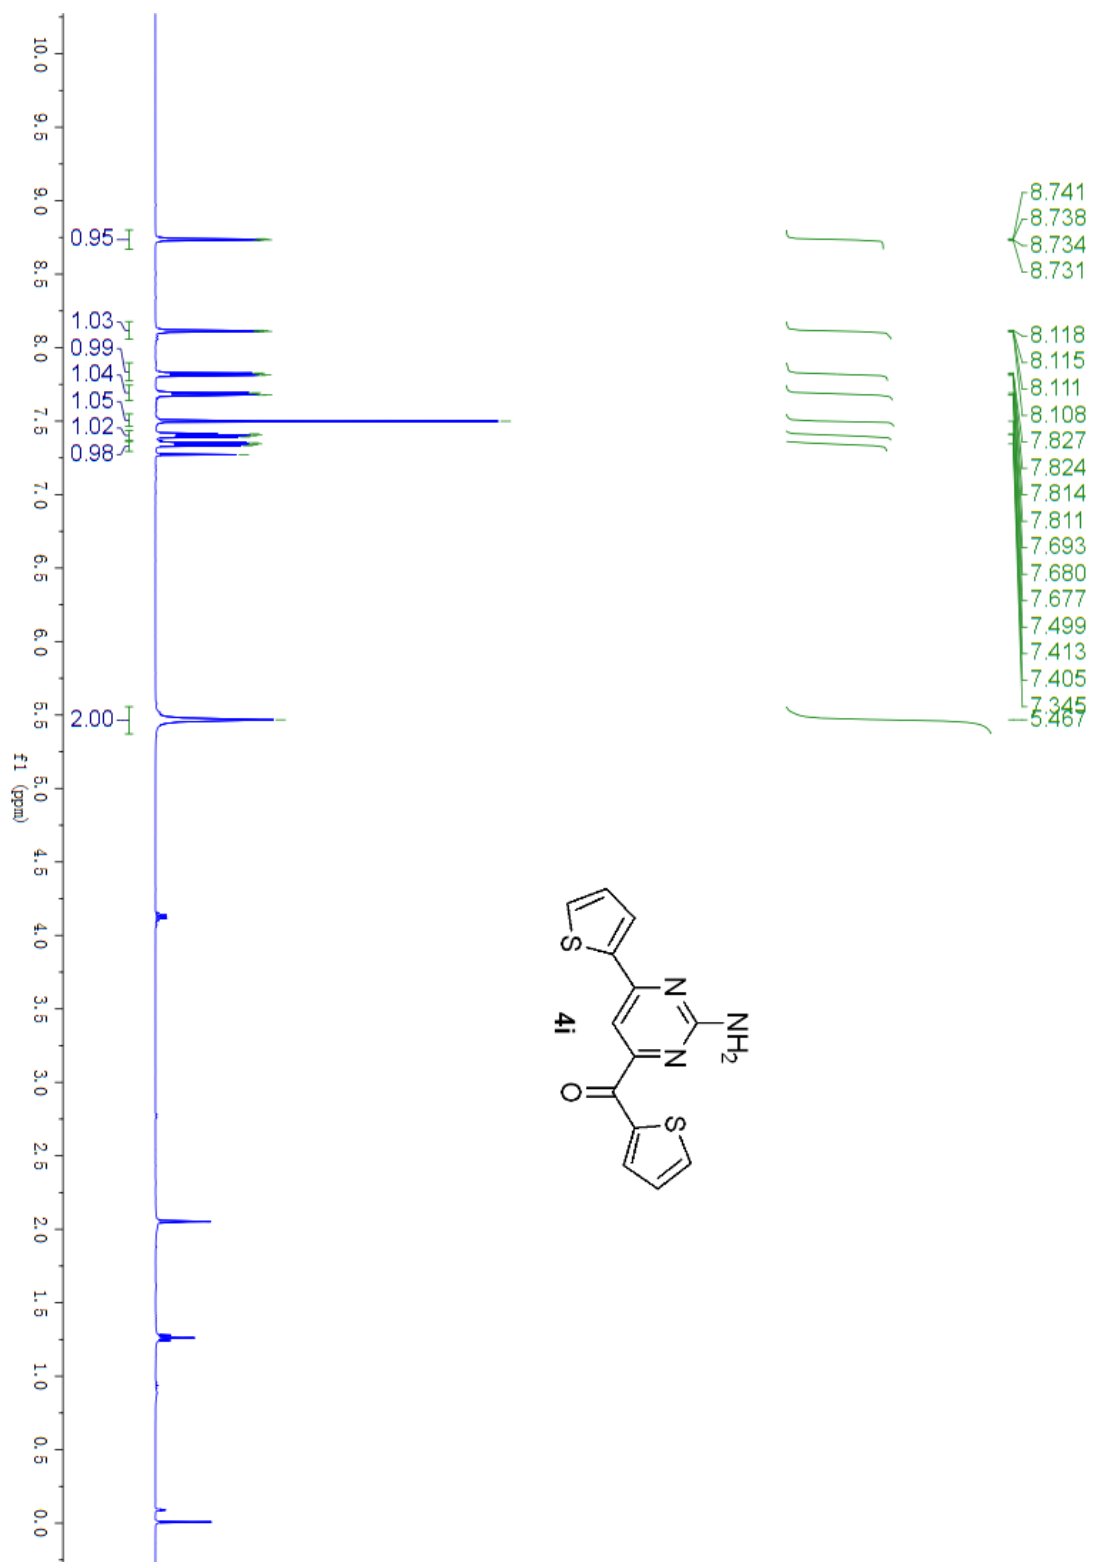

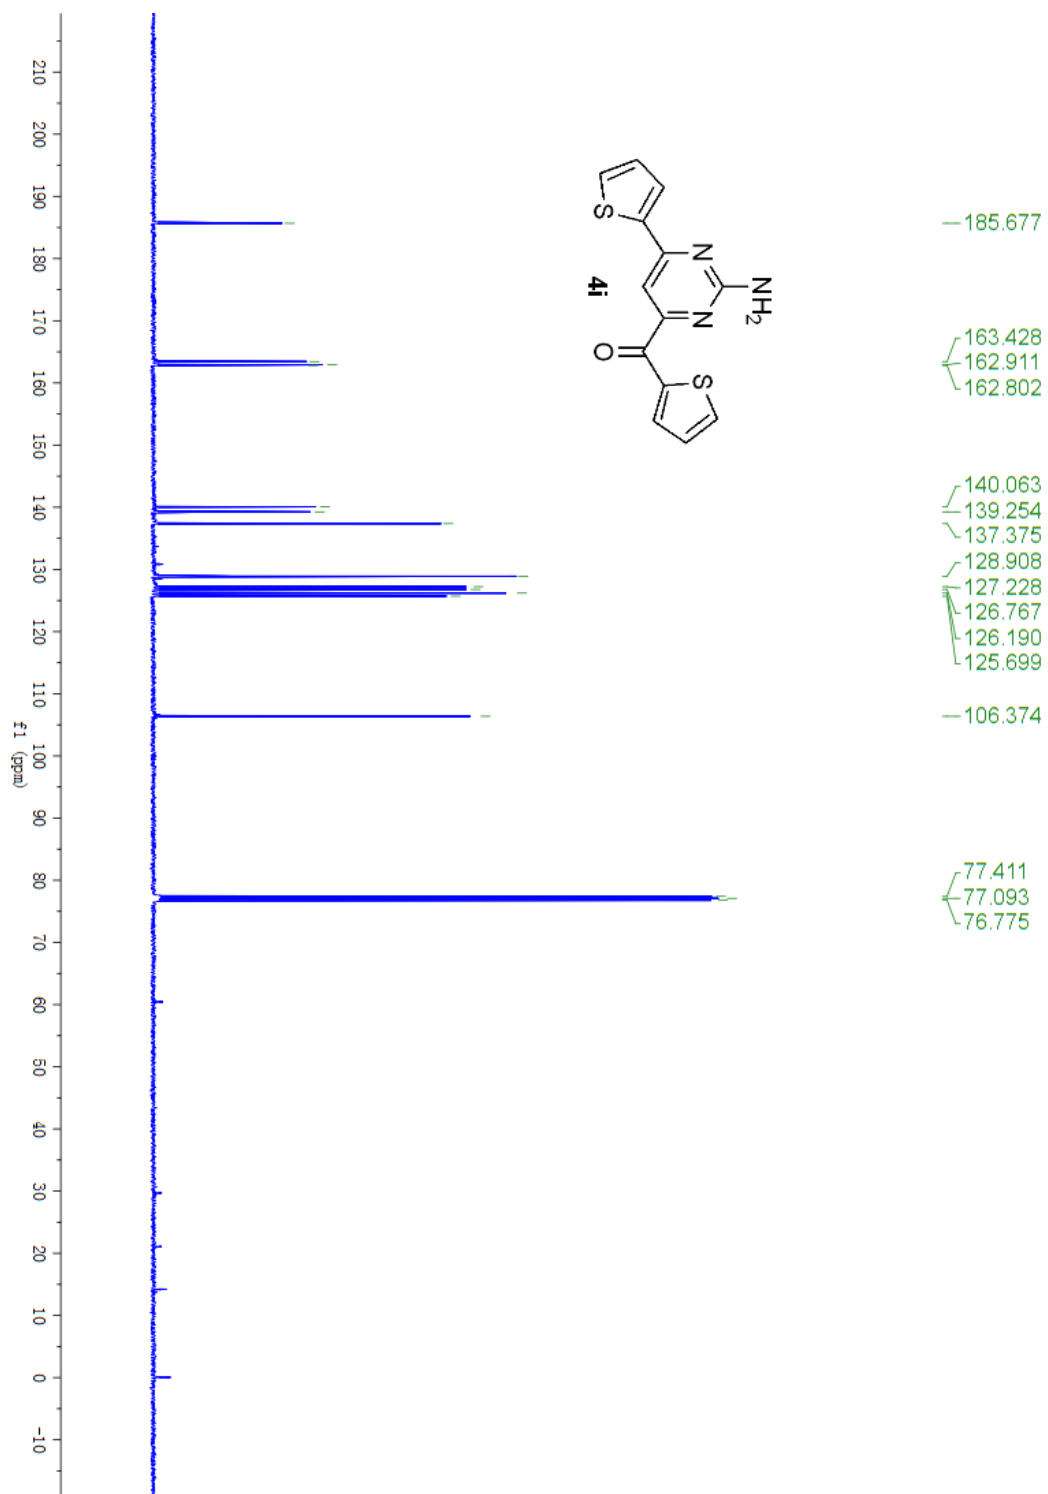

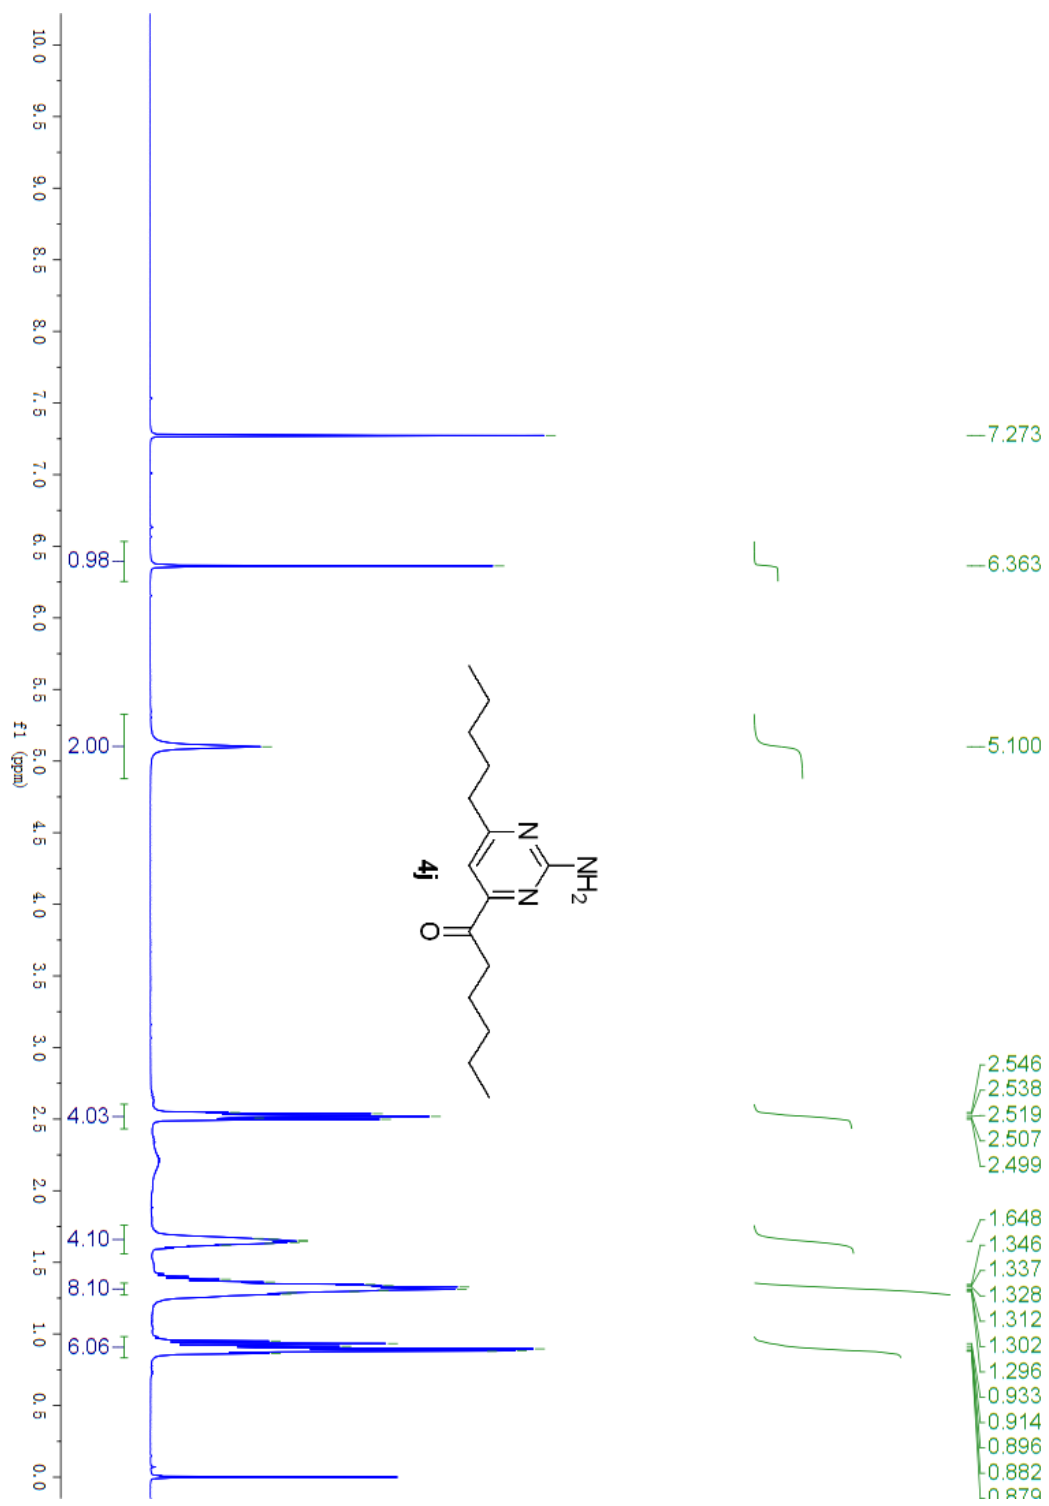

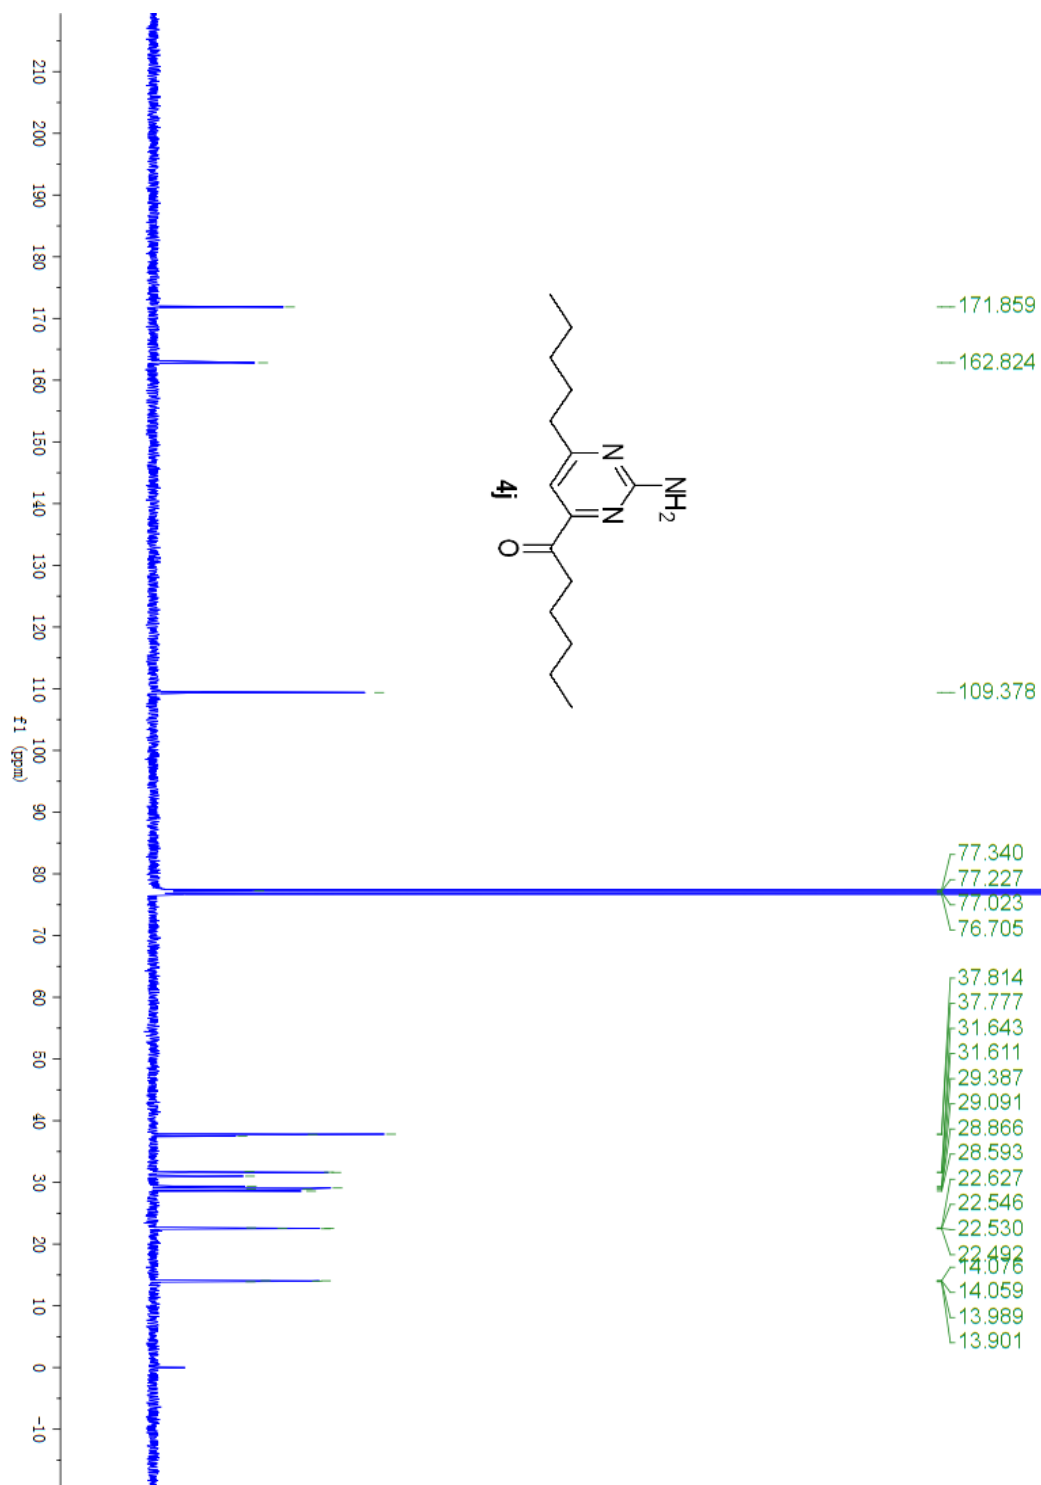

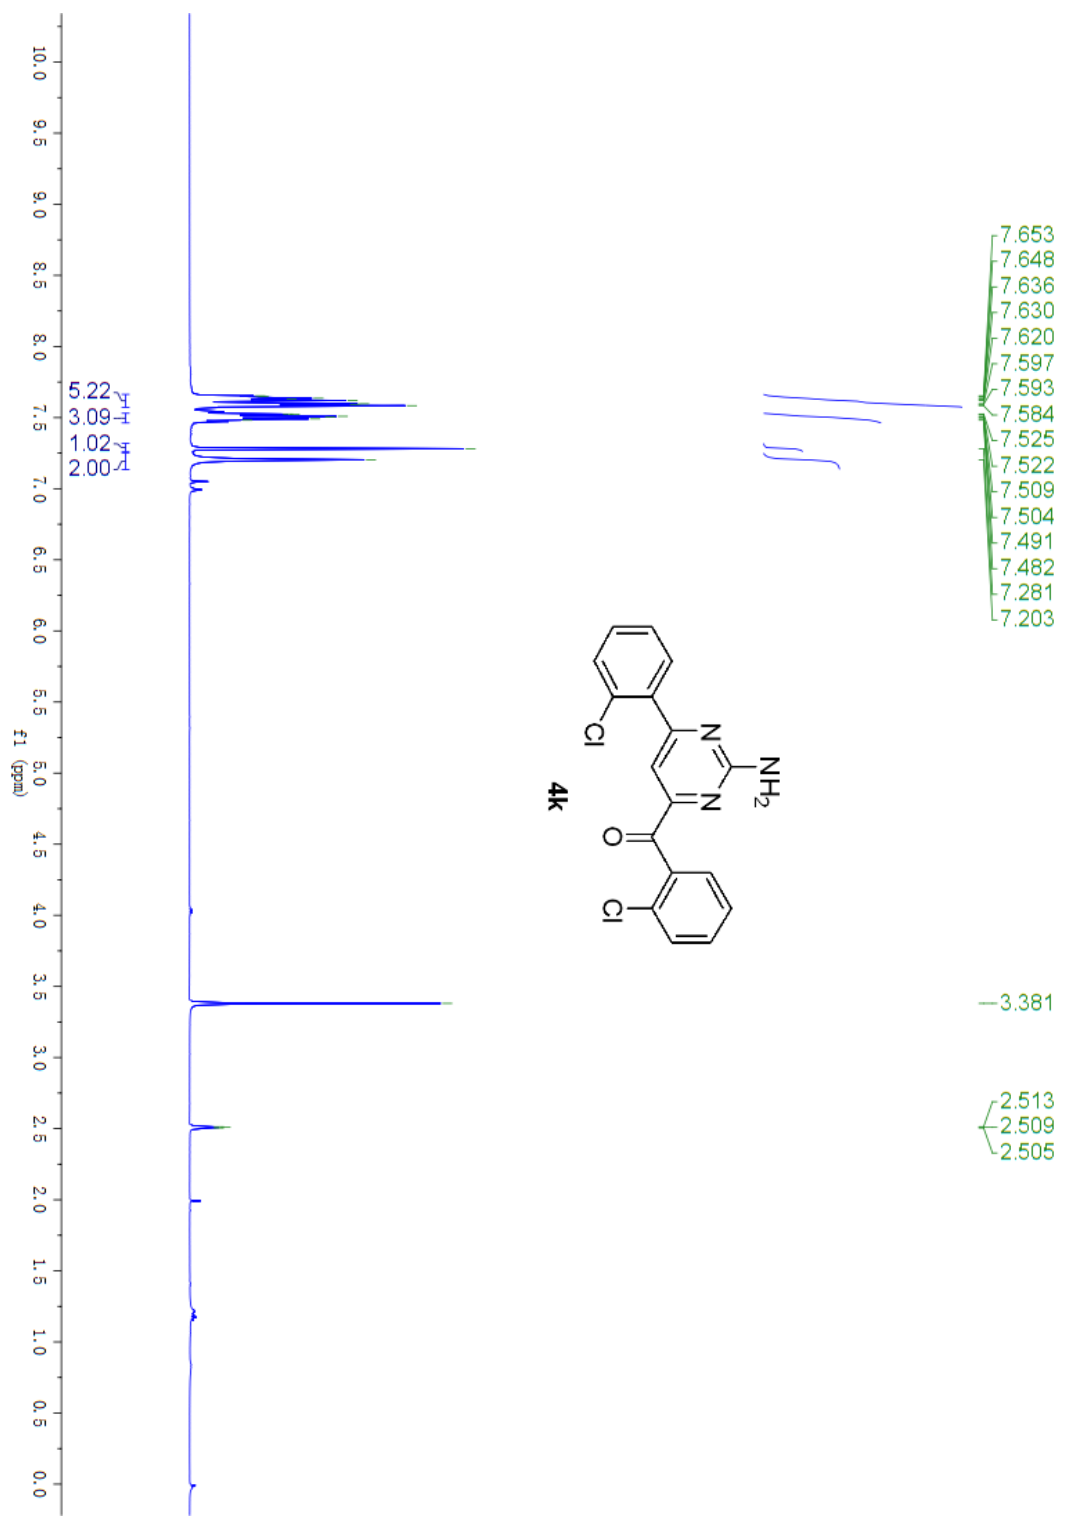

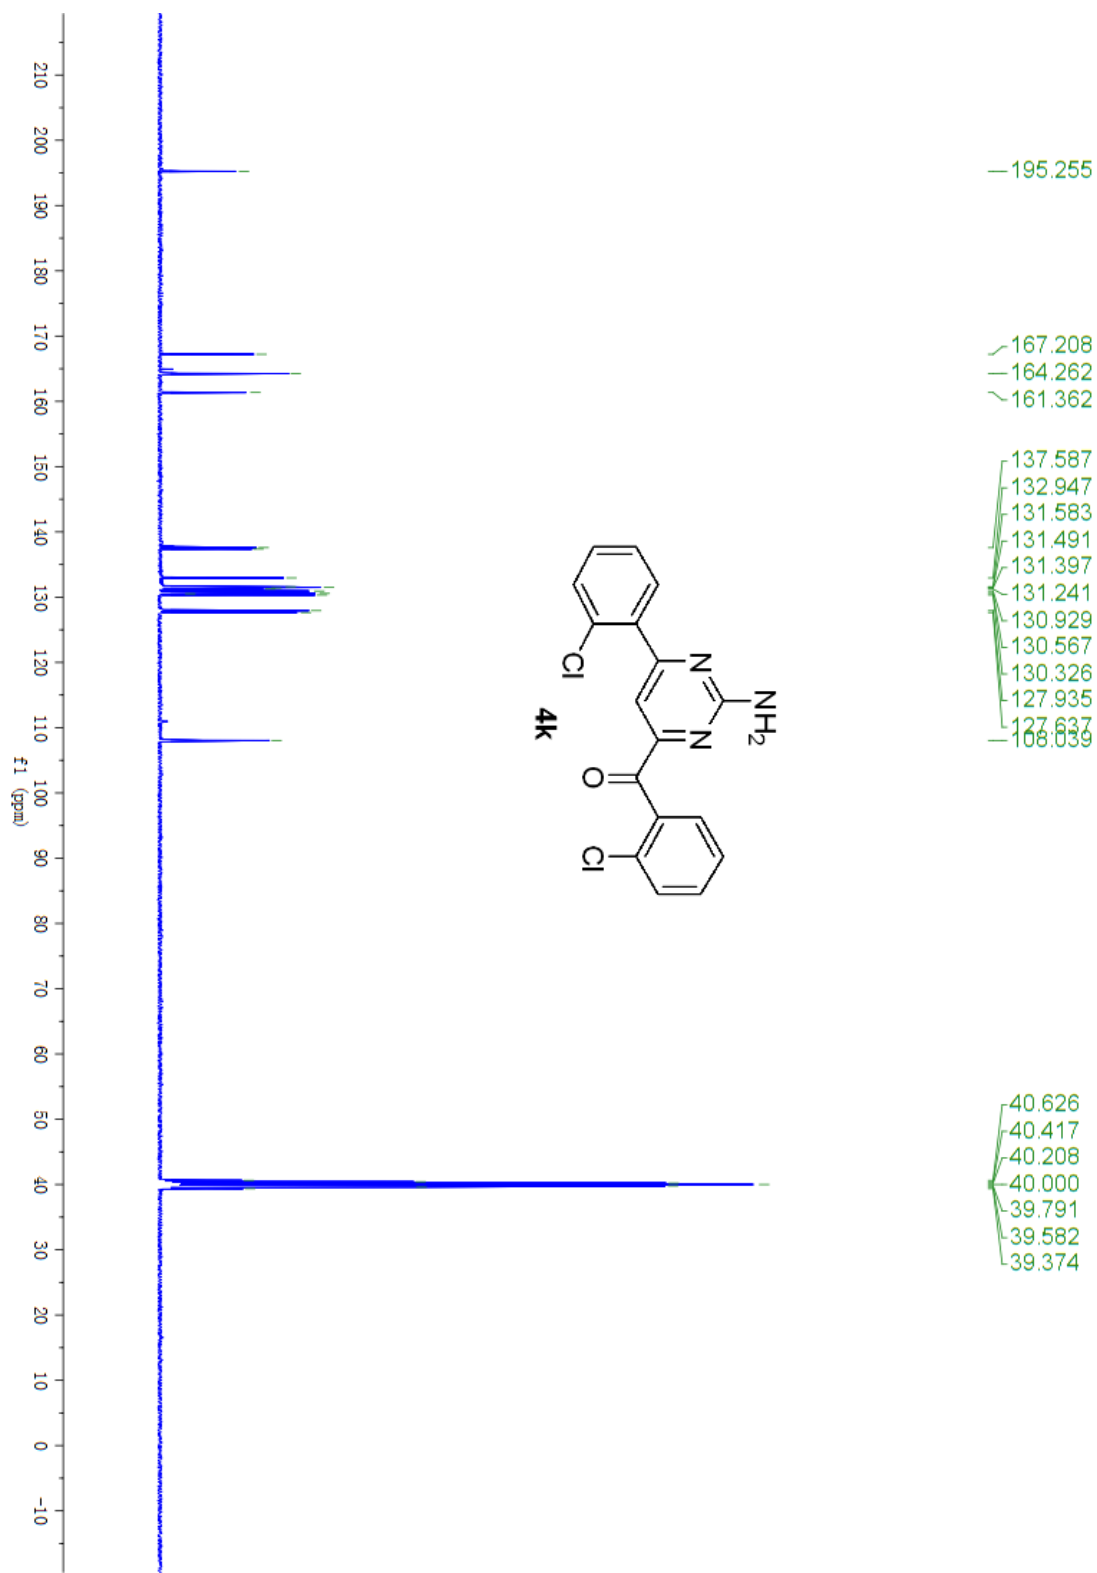



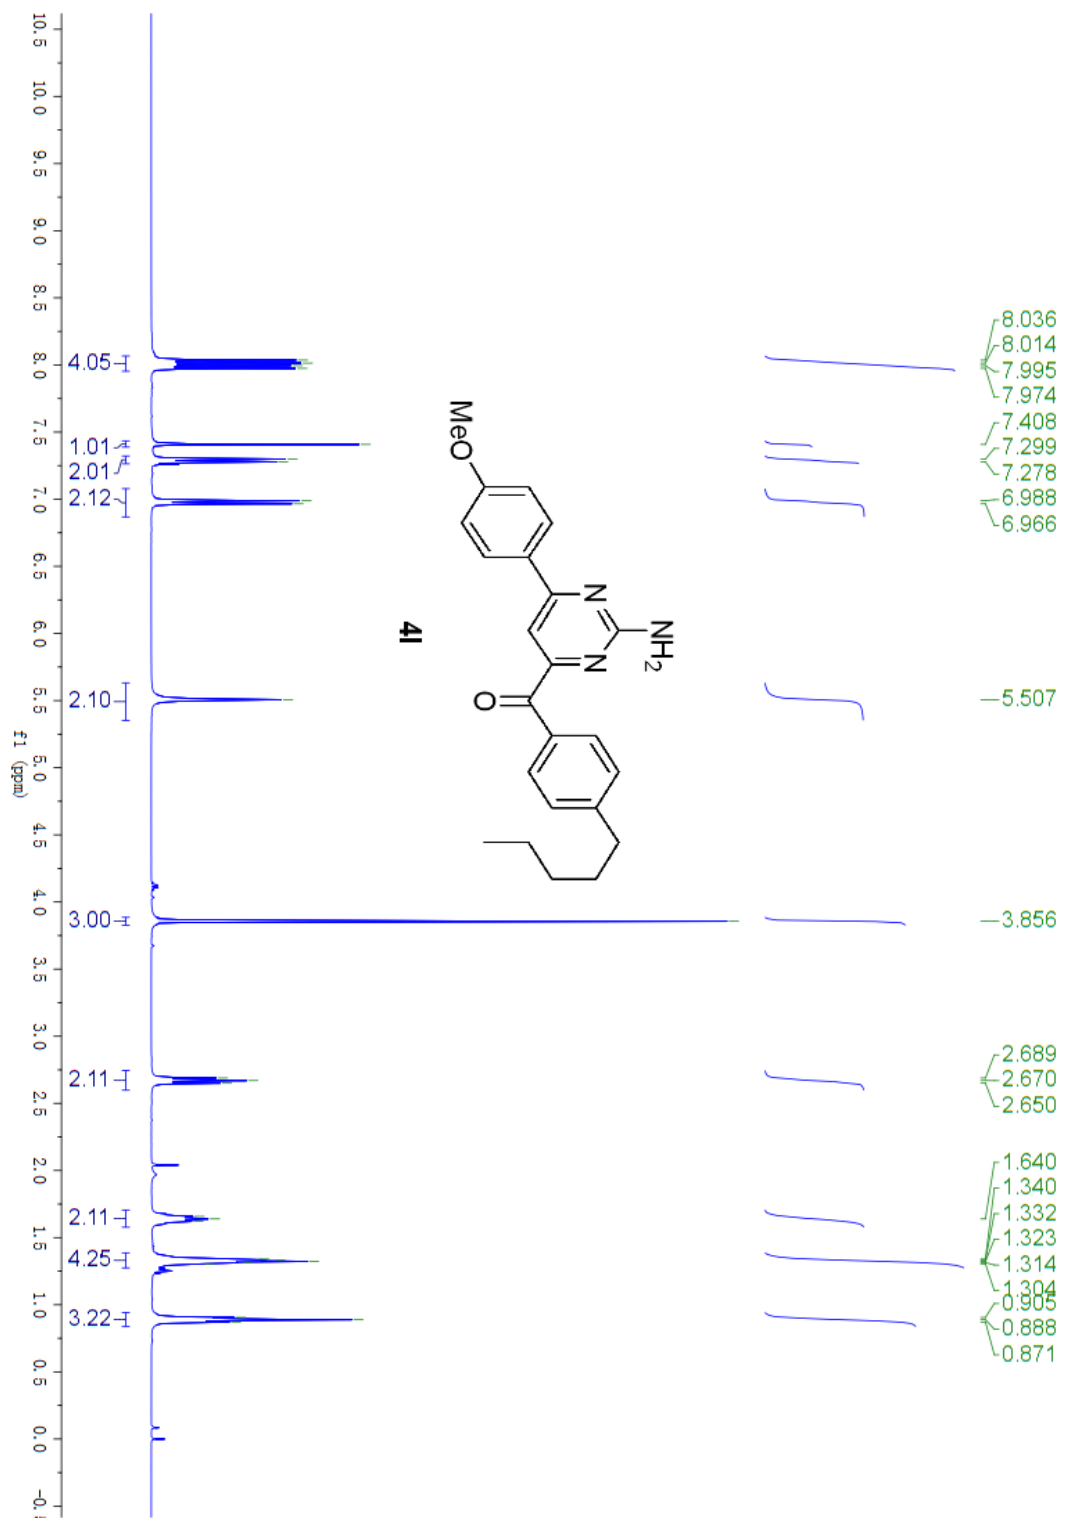

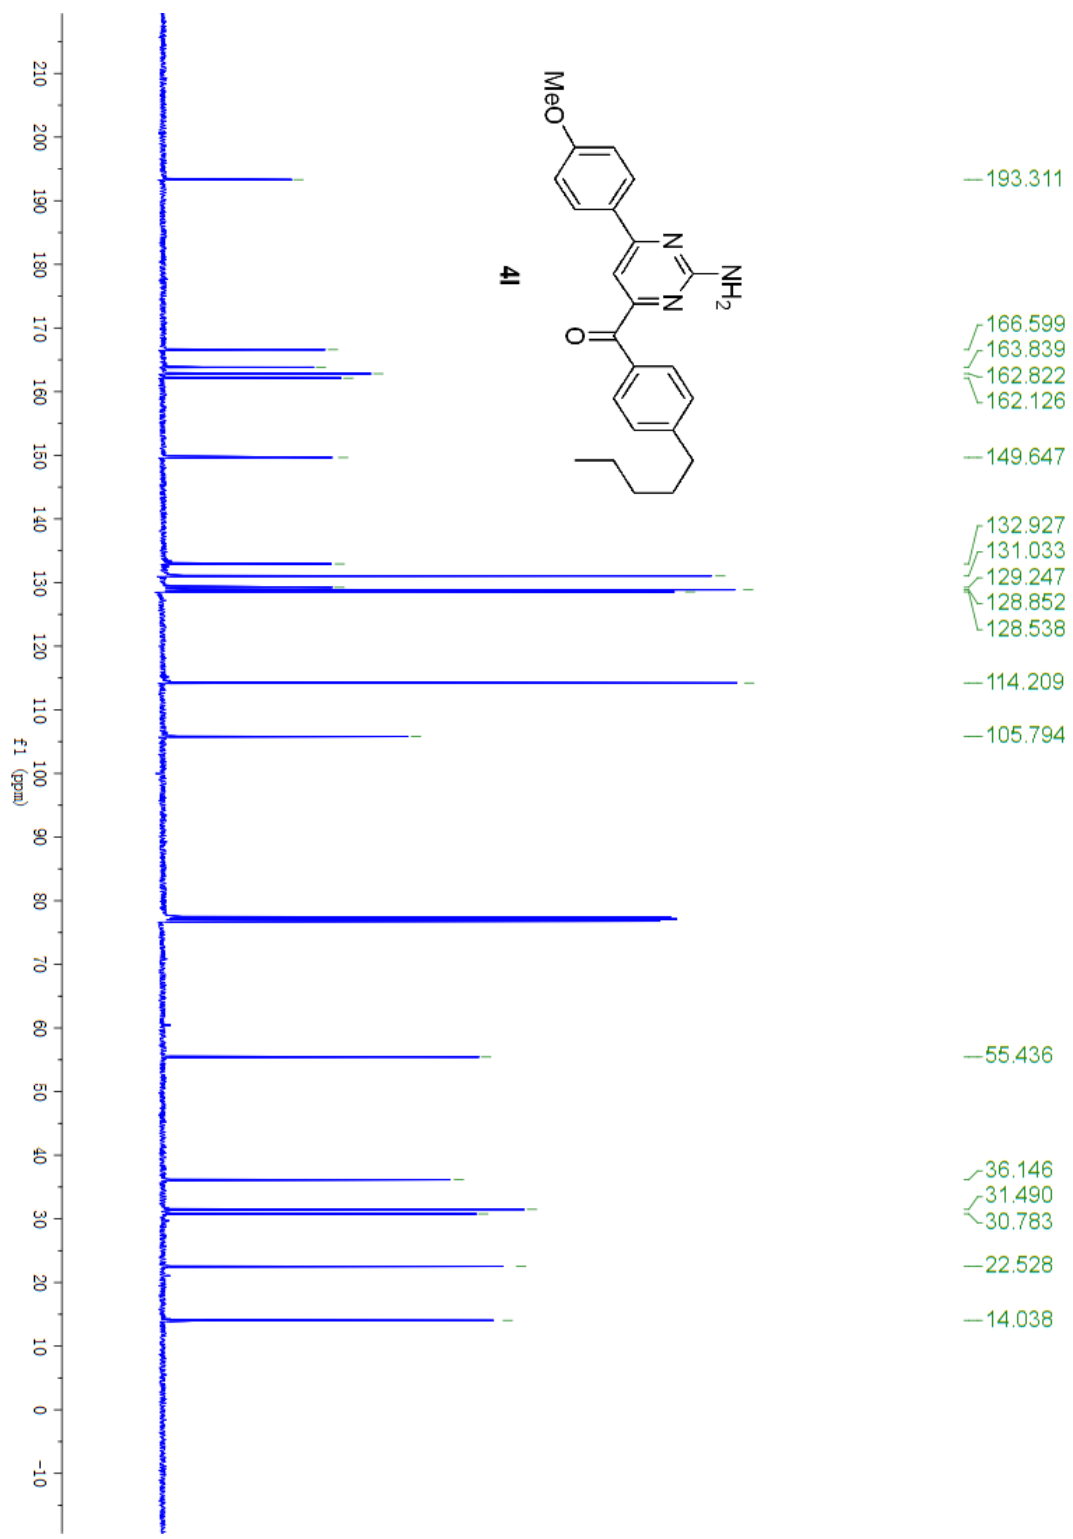

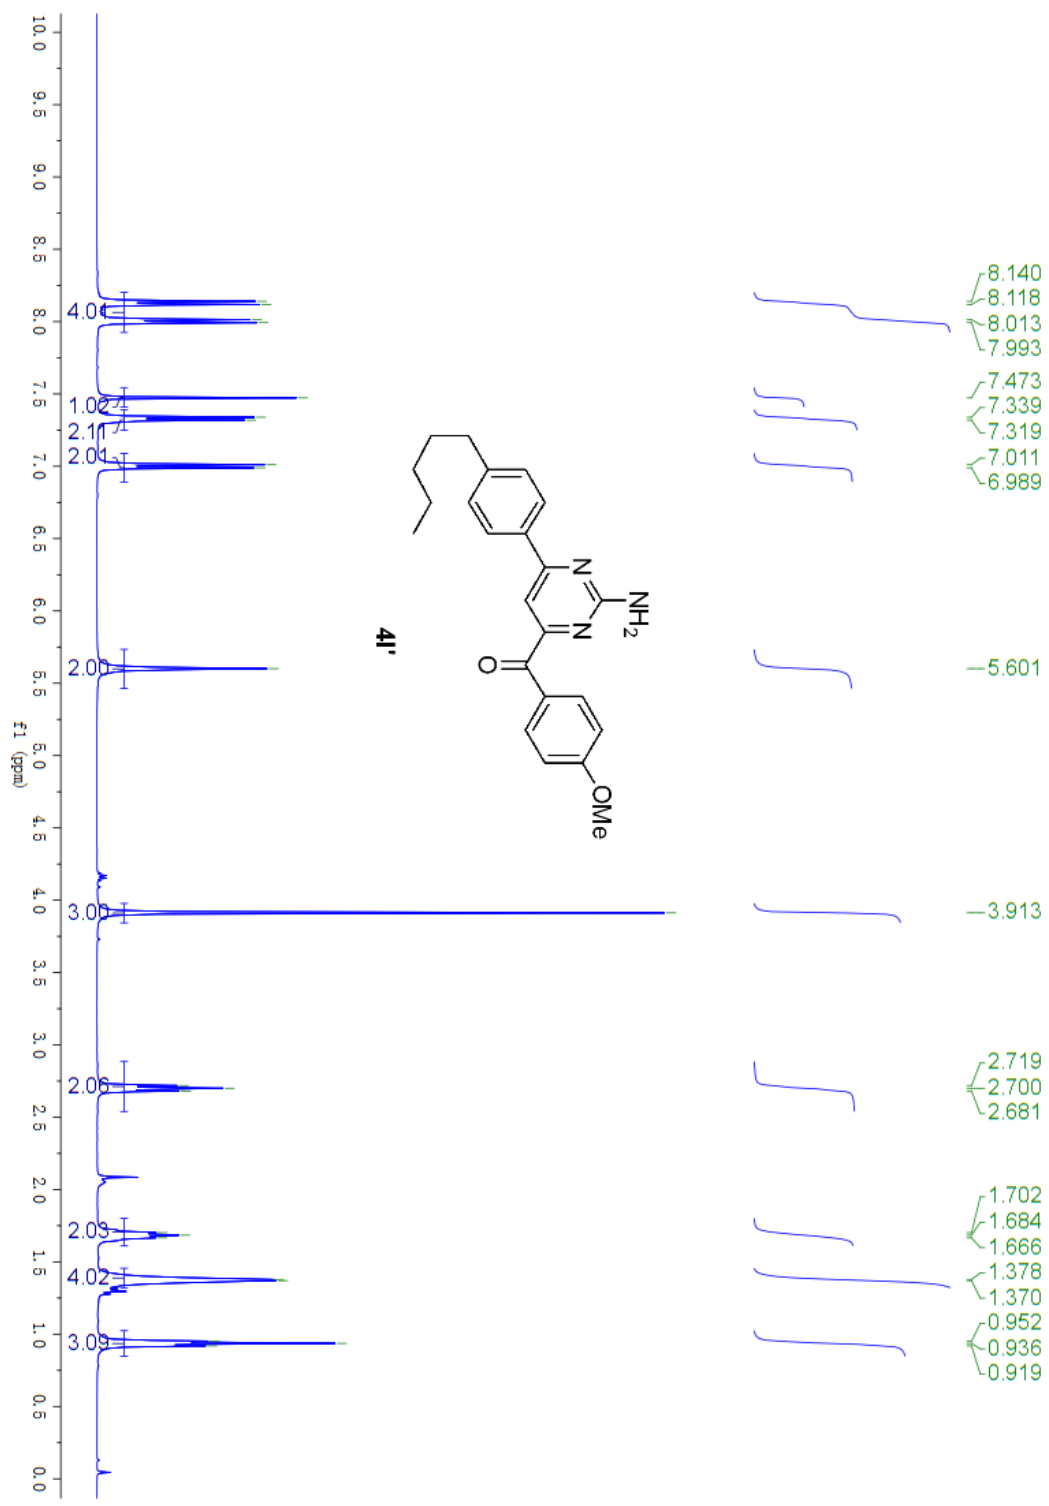

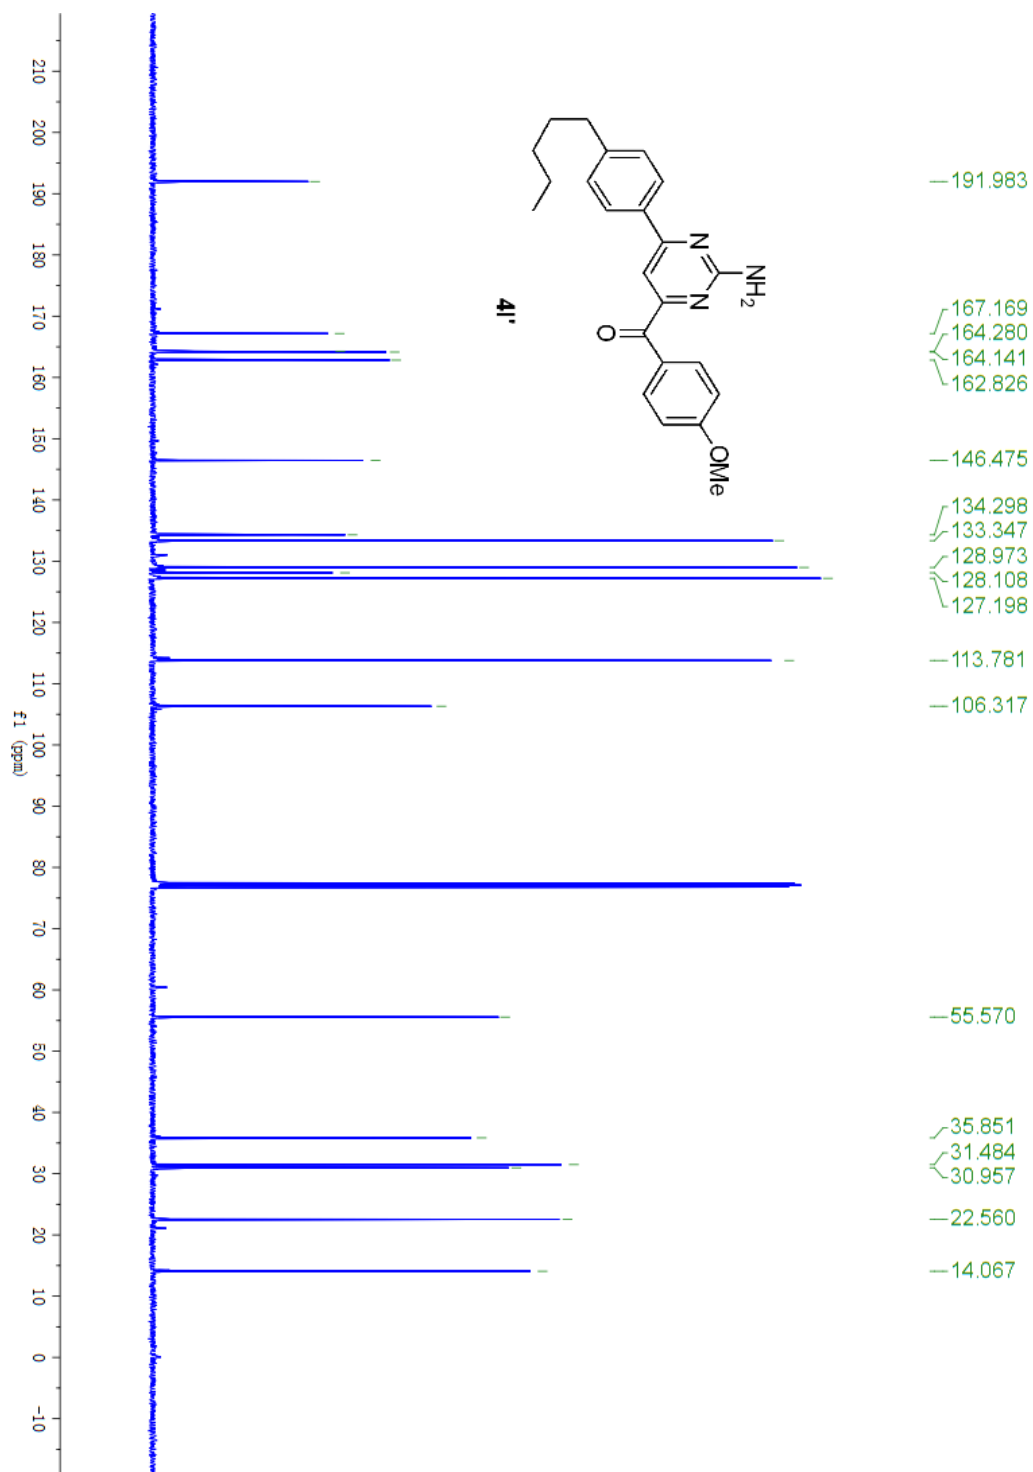

Supplement: c5cc02238j1.pdf [file c5cc02238j1.pdf]
